# Supplementary material for: High-throughput identification of synthetic riboswitches by barcode-free amplicon-sequencing in human cells
Source: PubMed Central journal article supplement (PMC7002664; doi:10.1038/s41467-020-14491-x), 2020-02-05
Supplement: 41467_2020_14491_MOESM1_ESM.pdf [file 41467_2020_14491_MOESM1_ESM.pdf]

Supplementary Information

**High-throughput identification of synthetic riboswitches  
by barcode-free amplicon-sequencing in human cells**

Strobel *et al.*

## Supplementary Figure 1

**a**

```
cctgcaggcagctgctgctgctgctcactgaggccgcccgggcaaaagccgggctgaggcgaccttggcgcccgccctcagtgagcagc
gagcgcgagagaggggagtgccaactccatcactaggggtccctgcggccgcacgcttagttataatagtaataattacggggtcattagttcat
agcccatatattggagttccgcttacataactacggtaaatggcccgcctggctgaccgccaacgacccccgccattgacgtcaataatgacgtatg
ttcccatagtaacgcaatagggactttccattgacgtcaatgggtggagtattacggtaaactgccacttggcagtagatcaagtgtatcatatgcaa
gtacgcccctattgacgtcaatgacgtgaaatggcccgcctggcattatgccagtagaccttatgggacttctacttggcagtagatctacgtatt
agtcacgtctattaccatggatgctggtttggcagtagatcaatggcgctggatagcgtttgactcacggggatttccaagctccacccccattgacgtc
aatgggagttgtttgaccaaatacaacgggactttccaaaatgctgtaacaactccgcccattgacgcaaatggcggtaggcgtgacgtggga
ggtctatataagcagagctcgttttagtaaccgctcagatcgctggagacgccatccacgctgtttgacctccatagaagacaccgggaccgatccag
cctccgcggttcgaacatcgattgaattccccgggatccgcccactatggtgagcaaggcgaggagctgttcacgggggtggtgccatcctggctc
gagctggacggcgacgtaaacggccacaagttcagcgtgctccggcgagggcgagggcgatgccactacggcaagctgaccctgaagttcatctgc
accaccggcaagctgcccgtgccctggcccaccctcgtgaccaccctgacctacggcgtgcagtgcttcagccgctaccccggaccacatgaagcagc
acgactctcaagctcccatgcccgaaggctacgtccaggacgcacatctcttcaaggacgacggcaactacaagaatccaccccggcggaggtgaa
gttcgagggcgacacccctggtgaaccgcatcgagctgaaggcctcagactcaaggaggacggaacatcctggggcacaagctggagtacaact
acaacagccacaacgtctatcatgcccgaacagcagaagaacggcatcaaggtgaactcaagatccgccacaacatcgaggacggcagcgtg
cagctgcggaccactaccagcagaacacccccatcggcgacggccccgtgctgctgcccgaacactacctgagcaccagctccgcccctgag
caaagacccaacgagaagcgcgacacatgctcgtgagttcgtgaccggcgggacactcctcgcatggacgagctgtacaagtccggc
cggactcagattcgagctcaagtttgaatttagaagcttggctaccattgcagcgttattcccagctccaaacaacaaaaggcgctcctggattcnnn
nnaaaacatacagattcgaatcgtgagaggtgaagaatacgcaccctnnatcatccagctgatgagtcctcaaataggacgaaacggcgtcaaac
aaacaaaagcctgggtaaaattgtatccgctagatctctgtttattgcagcttataatggttacaataaagcaatagcatcaaaatccacaataaagca
tttttctcgtctctgattgtgtttgtccaaactcatcaatgtatcttaacggcggcggcagctcgggacggcagcggcggcaggaacccctagtgtgga
gtggccactccctctgctgctgctgctcactgaggccggcgaccaaaaggtcgcccagcggcggttggcccggcgccctcagtgagcg
agcgagcgcgacgtcctgcagg
```

**b**

```
aagcttggctaccattgcagcgtattcccagctccaaacaacaaaaggccggcatggtcccagcctcctcgtgctggcggcgctgggcaannntataat
cgcgctggatattggcagcgaagtttaccgggaccggtaaatgtccgactannngcgaatgggacgcacaaatctcttagcaacaacaaaagcct
ggtgaaattgttatccgctagatct
```

**c**

```
aagcttggctaccattgcagcgtattcccagctccaaacaacaaaaggcgctcctggattcnnnnntataatcgcgctggatattggcagcgaagtttcta
ccgggacccgtaaatgtccgactannfacatccagctgatgagtcctcaaataggacgaaacggcgtcaacaacaaaagcctgggtaaaattgttatcc
gctagatct
```

**d**

```
aagcttggctaccattgcagcgtattcccagctccaaacaacaaaactttaaagcgggtacaagcccgaacaaatagcagagtaacnnngagaggt
gaagaatcgcaccactaggctcgaagagcctaaacatacnnngttaatgcagctttaaaggcaacaacaaaagcctgggtaaaattgttatccg
ctagatct
```

**e**

```
aagcttggctaccattgcagcgtattcccagctccaaacaacaaaagcagtaagtnnnntataatcgcgctggatattggcagcgaagtttaccgggac
cgtaaatgtccgactannnactactgcaacaacaaaagcctgggtaaaattgttatccgctagatct
```

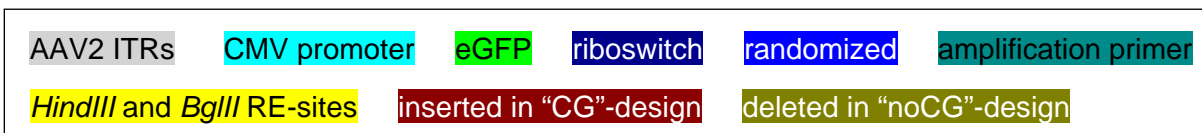

**Fig. 1: Sequences of riboswitch plasmids.** (a) Tet-hammerhead library plasmid. The same construct with defined instead of randomized nucleotides was also used for the functional characterization of individual aptazyme candidates. (b) Gua-HDV library construct. (c) Gua-HHR library construct. (d) Tet-Twister library construct. The sequence shown here represents the "CG\_3N3N" sub-library. Optionally inserted CG pairs in the so-called "CG"- and "noCG"-designs are indicated (see legend). (e) Gua-U1 library construct. ITR, inverted terminal repeat, CMV, cytomegalovirus, eGFP, enhanced green fluorescent protein, RE= restriction enzyme.

The data analysed in the context of this study were processed using a computational analysis pipeline implemented in bpipe. The plots and tables in Suppl. Figs. 2-6 and 8 are taken out of the HTML report generated by the pipeline.

## Supplementary Figure 2

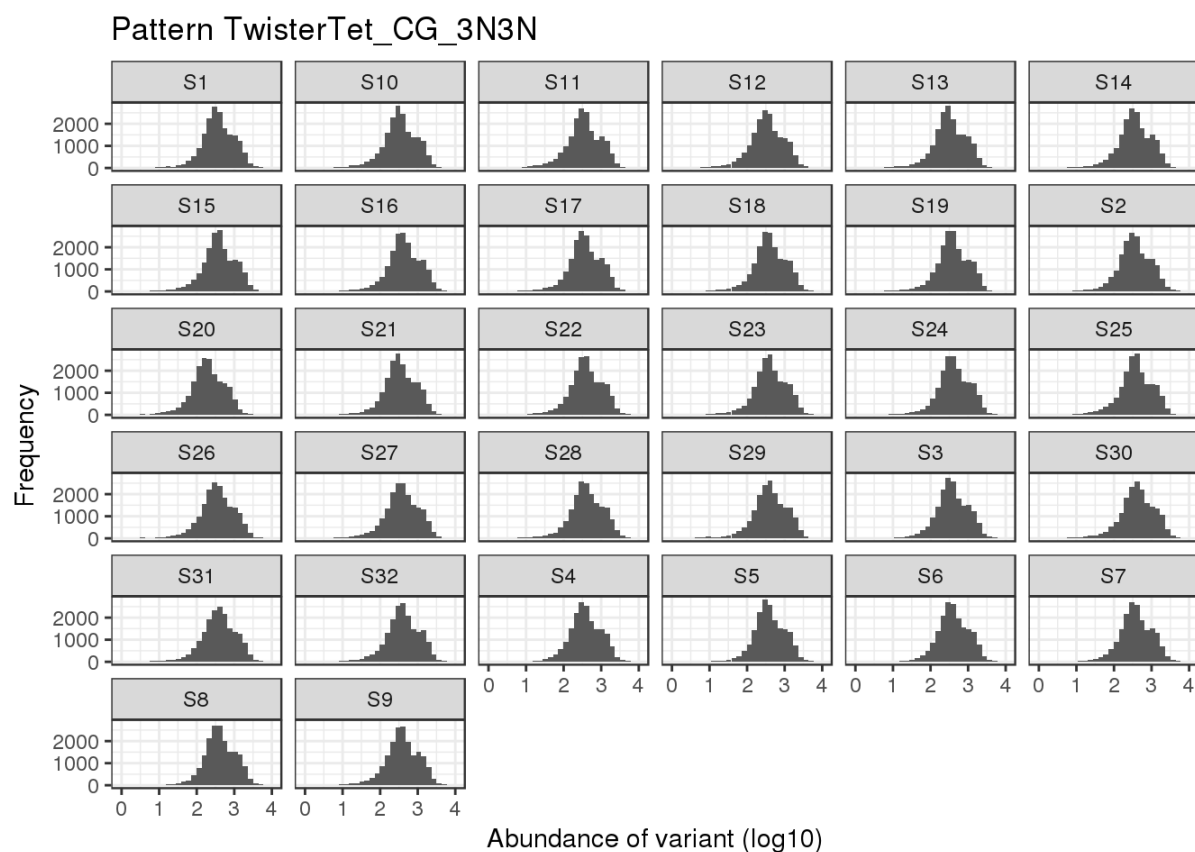

**Fig. 2: Per-sample variant abundance of library constructs (quality measure).** Exemplarily shown is the analysis for the CG\_3N3N Tet-Twister sub-library, screened using 32 replicate samples stimulated with increasing doses of Tet (n=8 per group. S1-S8, untreated; S9-16, 12.5  $\mu$ M Tet; S17-S24, 25  $\mu$ M Tet; S25-S32, 50  $\mu$ M Tet). For each sample, the distribution of raw counts per variant is plotted on a log10 scale. The abundance distribution is consistent across all samples.

**Supplementary Figure 3**

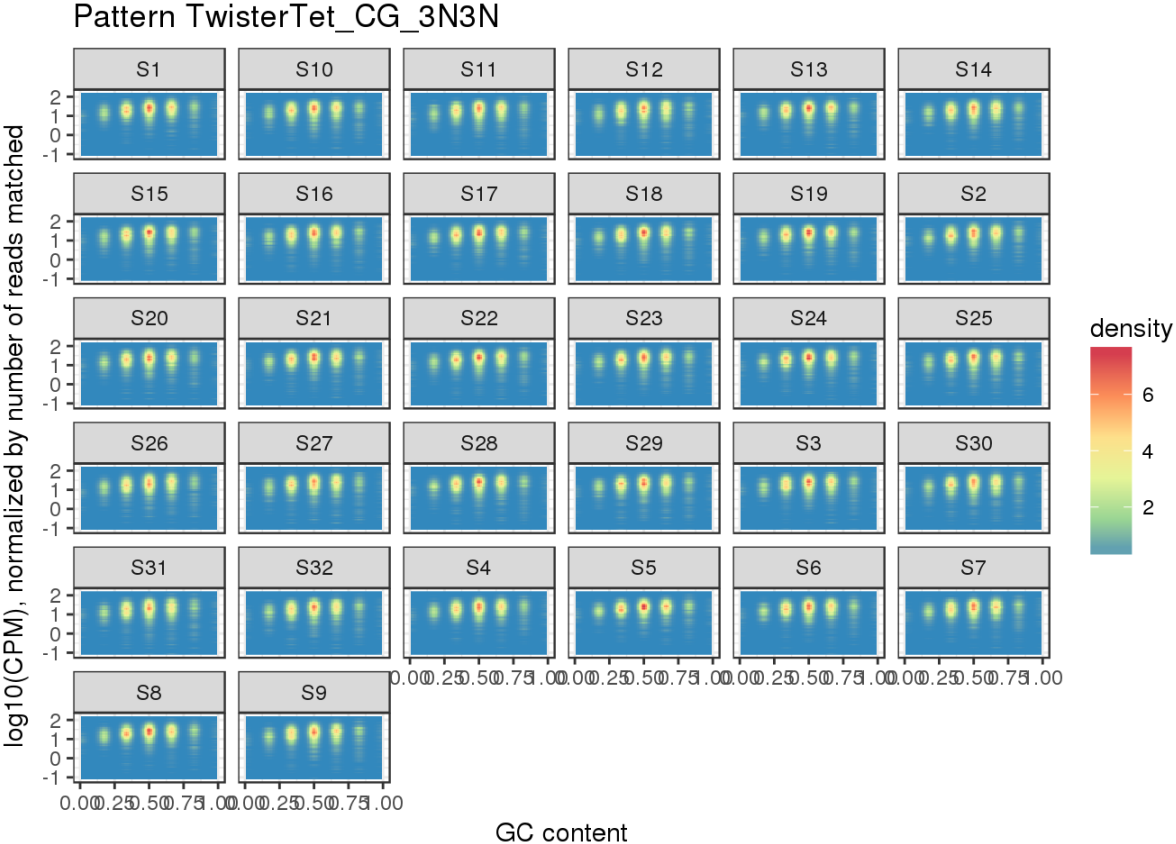

**Fig. 3: GC-dependence of variant abundance (quality measure).** Per-sample plots of the GC-content per variant vs. the log<sub>10</sub>(counts per million, CPM) per variant. The discrete values for GC-content result from the limited possibilities for 6 different nucleotides in the CG\_3N3N example. The dependence of overall variant abundance on the GC-content is generally low, and the samples do not show differences.

**Supplementary Figure 4**

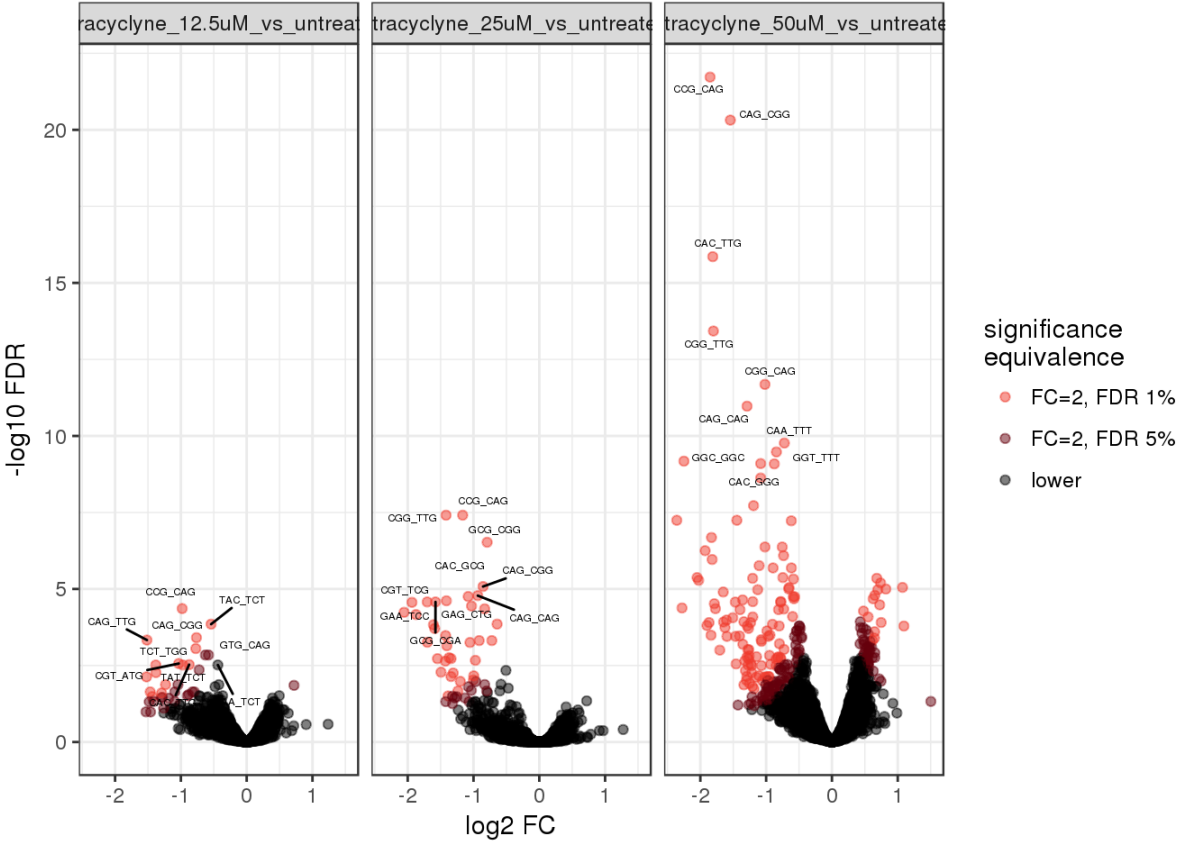

**Fig. 4: Volcano plot for differentially abundant variants.** Fold-changes and false discovery rate (FDR), as calculated using edgeR for different contrasts (Tet concentrations 12.5  $\mu\text{M}$ , 25  $\mu\text{M}$  and 50  $\mu\text{M}$  vs. untreated). Different significance levels (FDR 1% and 5%) are marked in red. The variable sequences of the variants with the lowest FDRs are annotated in the plot. In the present example of the Tet-Twister sub-library CG\_3N3N, the number of variants with differential abundance relative to the untreated control grows with increasing Tet doses.

Supplementary Figure 5

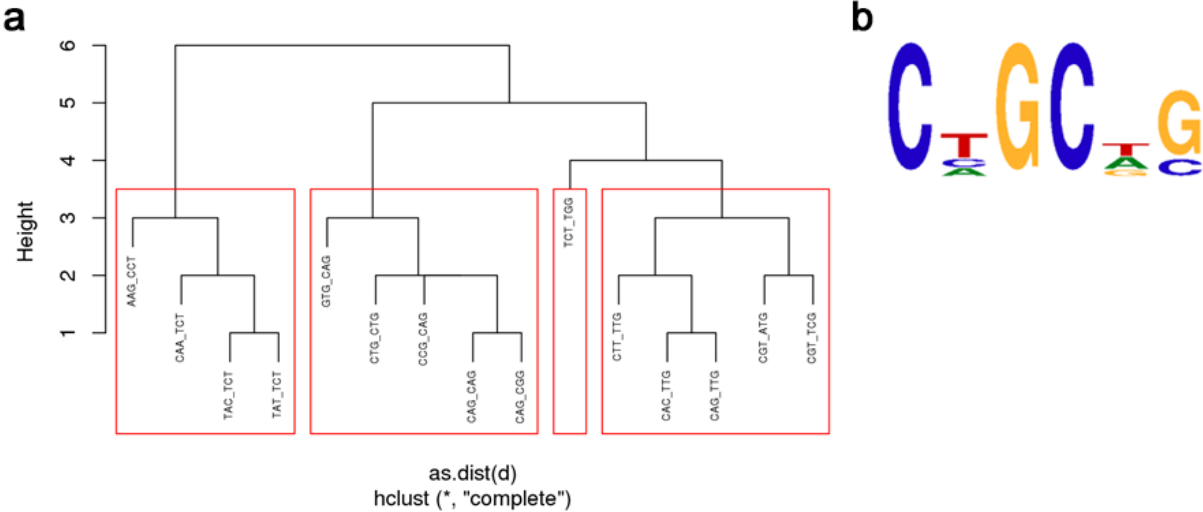

**Fig. 5: Sequence similarity analysis.** (a) Hierarchical clustering of variants with significant differential abundance at an FDR of 1%, based on the Hamming distance. The example shows differentially abundant variants for the Tet-Twister sub-library CG\_3N3N for 12.5  $\mu$ M Tet vs. untreated. (b) Position weight matrix of the variable regions of the second cluster.

## Supplementary Figure 6

12.5  $\mu\text{M}$  Tet vs. untreated, FDR<1%

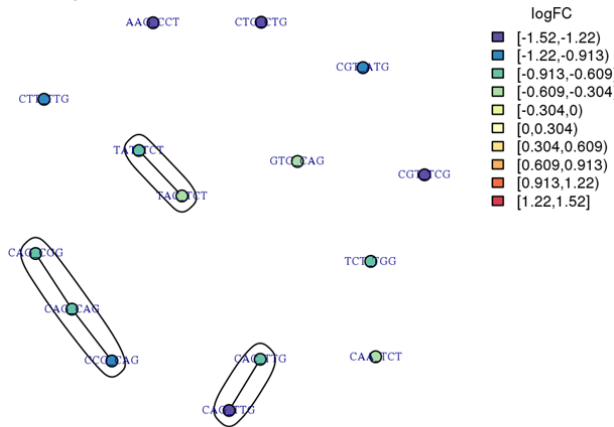

25  $\mu\text{M}$  Tet vs. untreated, FDR<1%

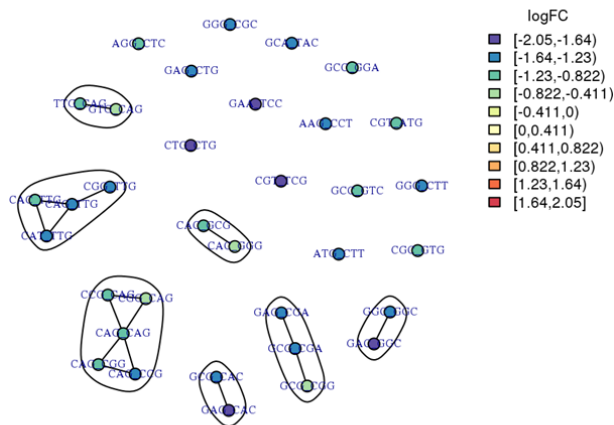

50  $\mu\text{M}$  Tet vs. untreated, FDR<1%

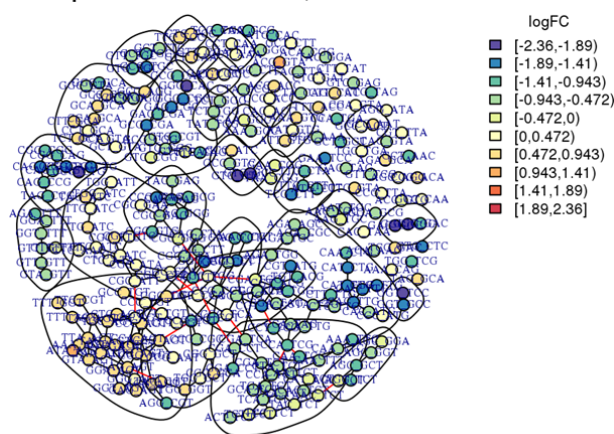

**Fig. 6: Network modules of similar variants.** Significant differentially abundant motifs are joined if they have a Hamming distance of 1 (single nucleotide difference only). The resulting network is clustered by community inference based on “edge betweenness”. Additionally, the individual variants are colored by logFC. Blue color indicates significantly lower abundance (negative fold change) in the respective contrast, while red color indicates significantly higher abundance (positive fold change). In this example, differentially abundant variants for the Tet-Twister sub-library CG\_3N3N at 12.5  $\mu\text{M}$  Tet vs. untreated, 25  $\mu\text{M}$  Tet vs. untreated, and 50  $\mu\text{M}$  Tet vs. untreated at an FDR of 1% are shown.

**Supplementary Figure 7**

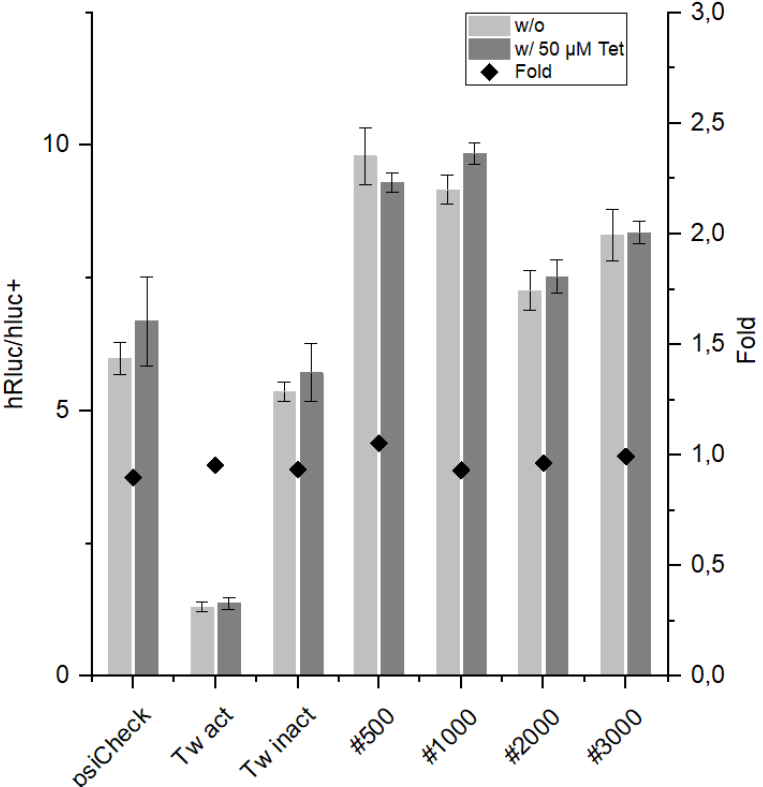

**Fig. 7: Switching performance of Twister constructs not fulfilling positive hit selection criteria.** Shown are luciferase reporter gene expression data in HeLa cells for the constructs that ranked #500, #1000, #2000 and #3000 in the list of all CG\_3N3N constructs that showed a log<sub>2</sub>-fold change of >-0.6 and FDR>0.01, sorted by log<sub>2</sub>-fold change at 50 μM Tet stimulation (n=3 replicates, mean ± SD). psiCheck: ribozyme-free control; Tw act/inact: constitutively active/inactive ribozyme controls.



Supplementary Figure 8

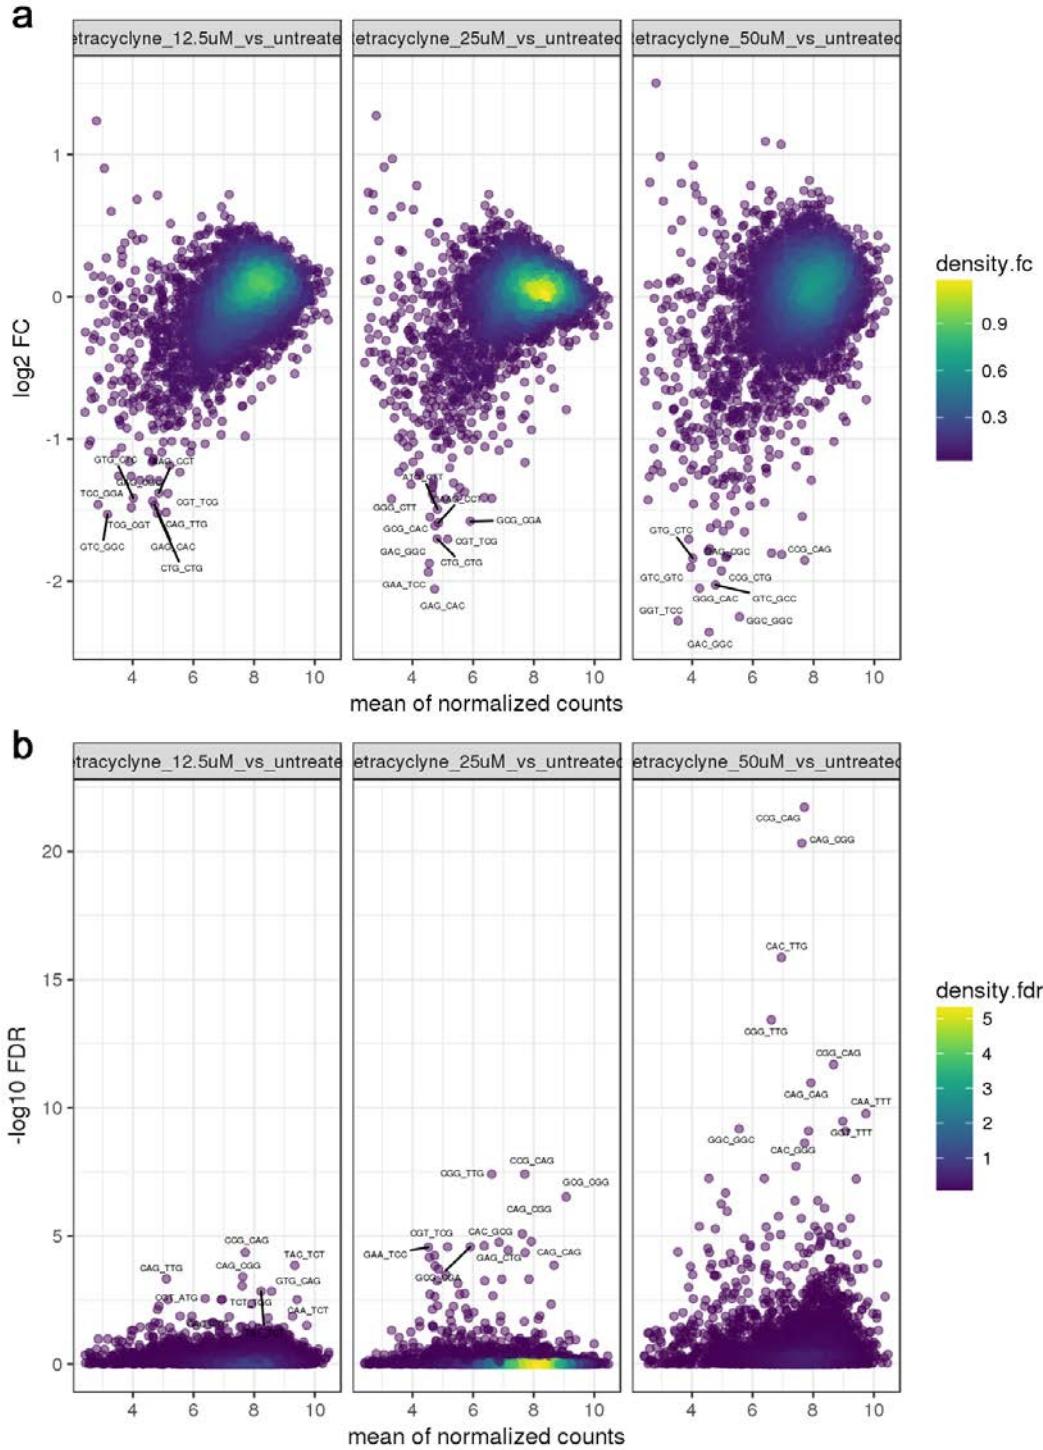

**Fig. 8: log<sub>2</sub>FC and FDR as a function of construct abundance.** Correlation of mean normalized counts with (a) log<sub>2</sub>FC and (b) -log<sub>10</sub> FDR, exemplarily shown for the Tet-Twister sub-library CG\_3N3N.

**Supplementary Figure 9**

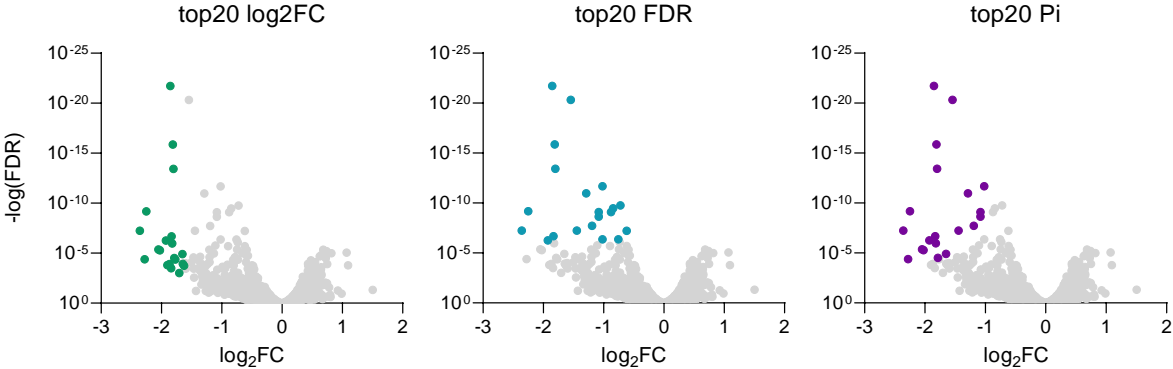

**Fig. 9: Dependence of hit selection on selection parameter used.** Shown are identical, exemplary volcano plots for the CG\_3N3N sub-library contained in the Tet-Twister screen. The top-20 constructs selected based on either ranking of  $\log_2\text{FC}$ , FDR or Pi-values are marked in each graph.

## Supplementary Figure 10

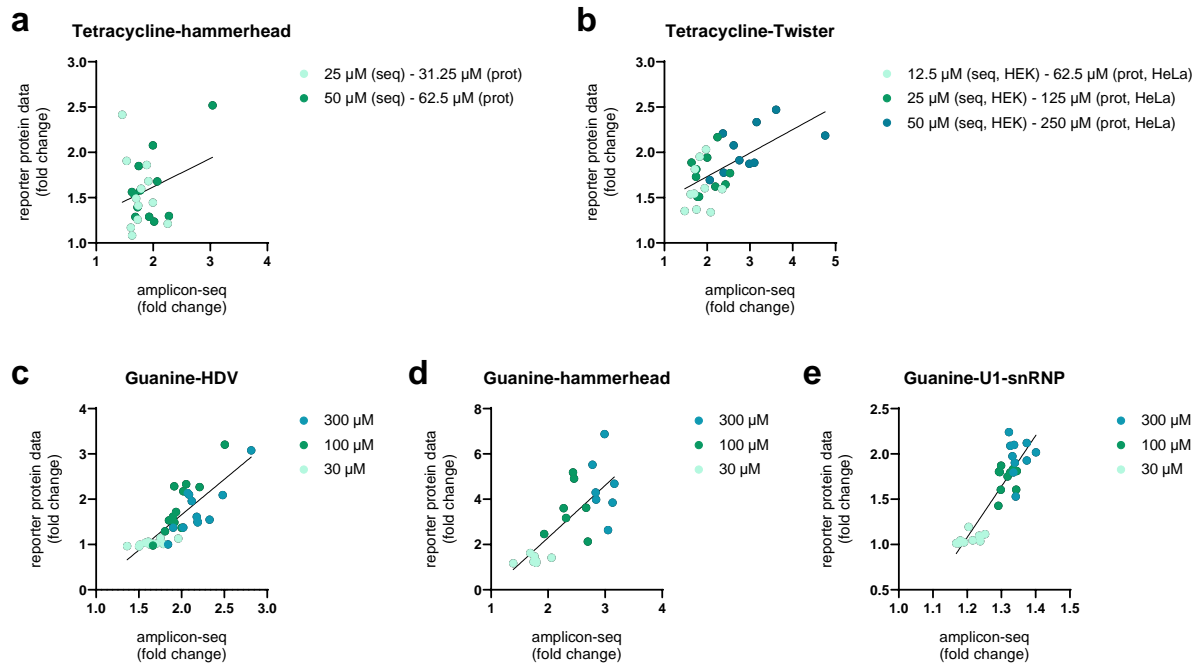

**Fig. 10: Correlation of amplicon-seq-derived and experimentally determined (cellular reporter protein assay) mean fold changes for all functional riboswitch constructs. (a) Tetracycline hammerhead hit constructs (compare main Fig. 2f). (b) Guanine-HDV constructs (compare main Fig. 3d). (c) Guanine-hammerhead constructs (compare main Fig. 4d). (d) Tetracycline-Twister constructs (compare main Fig. 5c). (e) Guanine-U1-snRNP constructs (compare main Fig. 6e). seq= amplicon-seq-derived data, prot= reporter protein assay-derived data. Regression curves were generated using the “linear regression” feature in GraphPad Prism.**

### Supplementary Table 1

| #  | Motif           | K   | logFC<br>25 $\mu$ M | logFC<br>50 $\mu$ M | logCPM | Pvalue<br>25 $\mu$ M | Pvalue<br>50 $\mu$ M | FDR<br>25 $\mu$ M | FDR<br>50 $\mu$ M |
|----|-----------------|-----|---------------------|---------------------|--------|----------------------|----------------------|-------------------|-------------------|
| 1  | TAAAC_AG        |     | 1,453               | 2,428               | 0,944  | 9,3E-04              | 3,8E-08              | 0,330             | 0,000             |
| 2  | GTAGT_AC        |     | 0,544               | 1,605               | 1,961  | 1,3E-01              | 9,0E-06              | 1,000             | 0,004             |
| 3  | AATAG_AC        |     | 1,031               | 1,455               | 2,254  | 3,5E-03              | 4,2E-05              | 0,537             | 0,012             |
| 4  | CGTCT_GG        |     | 0,756               | 1,193               | 2,713  | 1,8E-02              | 1,9E-04              | 0,921             | 0,040             |
| 5  | GTATG_CA        |     | 1,173               | 1,185               | 3,929  | 4,6E-08              | 3,4E-08              | 0,000             | 0,000             |
| 6  | GATAA_CC        |     | 1,009               | 1,142               | 1,800  | 1,1E-02              | 3,9E-03              | 0,777             | 0,274             |
| 7  | GTAAG_AC        |     | 0,211               | 1,126               | 1,288  | 5,9E-01              | 3,4E-03              | 1,000             | 0,256             |
| 8  | TAAAT_CT        |     | 0,527               | 1,122               | 1,919  | 1,3E-01              | 1,4E-03              | 1,000             | 0,151             |
| 9  | CGAAC_GG        |     | 0,247               | 1,113               | 1,950  | 5,0E-01              | 2,2E-03              | 1,000             | 0,200             |
| 10 | AAAAA_AT        |     | 0,545               | 1,108               | 0,998  | 1,6E-01              | 4,0E-03              | 1,000             | 0,274             |
| 11 | CATAA_GG        |     | 0,841               | 1,059               | 1,143  | 2,4E-02              | 4,5E-03              | 0,932             | 0,288             |
| 12 | GTGGT_GC        |     | 0,937               | 1,050               | 5,166  | 1,8E-11              | 5,7E-14              | 0,000             | 0,000             |
| 13 | GTAGG_AC        |     | 0,938               | 1,020               | 2,310  | 3,8E-03              | 1,7E-03              | 0,552             | 0,170             |
| 14 | GTAGG_CT        |     | 0,703               | 1,011               | 5,809  | 1,5E-08              | 4,7E-16              | 0,000             | 0,000             |
| 15 | CACCA_CT        |     | 0,627               | 1,002               | 1,823  | 6,3E-02              | 2,9E-03              | 1,000             | 0,235             |
| 16 | CAACC_GG        |     | 0,356               | 1,000               | 1,411  | 3,1E-01              | 4,1E-03              | 1,000             | 0,279             |
| 17 | <b>GTGGT_AC</b> | K19 | 0,617               | 0,995               | 3,405  | 1,8E-02              | 1,4E-04              | 0,921             | 0,031             |
| 18 | GTGTT_AA        |     | 0,394               | 0,973               | 4,546  | 2,5E-02              | 3,6E-08              | 0,952             | 0,000             |
| 19 | AATAT_AG        |     | 0,762               | 0,953               | 1,694  | 3,7E-02              | 9,1E-03              | 1,000             | 0,379             |
| 20 | GTATT_AA        |     | 0,789               | 0,948               | 4,680  | 1,2E-06              | 6,0E-09              | 0,003             | 0,000             |
| 21 | GTGGC_GT        |     | 0,658               | 0,941               | 7,750  | 3,2E-13              | 2,6E-25              | 0,000             | 0,000             |
| 22 | GTAAG_CT        |     | 0,535               | 0,938               | 4,849  | 6,9E-04              | 3,0E-09              | 0,277             | 0,000             |
| 23 | CAAAAT_GG       |     | 0,070               | 0,934               | 0,375  | 8,7E-01              | 3,1E-02              | 1,000             | 0,535             |
| 24 | TAACC_AG        |     | 1,310               | 0,933               | 1,287  | 1,1E-03              | 2,0E-02              | 0,352             | 0,467             |
| 25 | ATAAT_AG        |     | 0,411               | 0,929               | 1,711  | 2,5E-01              | 9,1E-03              | 1,000             | 0,379             |
| 26 | GTGAG_CT        |     | 0,660               | 0,926               | 5,493  | 1,5E-07              | 2,0E-13              | 0,000             | 0,000             |
| 27 | AAAGA_TG        |     | 0,561               | 0,925               | 2,781  | 5,6E-02              | 1,6E-03              | 1,000             | 0,168             |
| 28 | GTAGA_AC        |     | 0,452               | 0,910               | 2,749  | 1,3E-01              | 2,6E-03              | 1,000             | 0,223             |
| 29 | GATAA.CG        |     | 0,620               | 0,909               | 2,172  | 7,7E-02              | 9,6E-03              | 1,000             | 0,383             |
| 30 | TTGAA_CC        |     | 0,634               | 0,905               | 2,367  | 5,1E-02              | 5,5E-03              | 1,000             | 0,308             |
| 31 | CACAT_GG        |     | -0,408              | 0,884               | 1,391  | 3,2E-01              | 2,8E-02              | 1,000             | 0,516             |
| 32 | CACGA_GG        |     | 0,388               | 0,864               | 2,372  | 2,3E-01              | 7,3E-03              | 1,000             | 0,350             |
| 33 | CAAGG_CT        |     | 0,279               | 0,842               | 4,139  | 1,6E-01              | 1,9E-05              | 1,000             | 0,006             |
| 34 | TAAGA.CG        |     | 0,694               | 0,839               | 2,790  | 1,9E-02              | 4,5E-03              | 0,921             | 0,289             |
| 35 | TAATA_AG        |     | 0,883               | 0,835               | 0,502  | 5,8E-02              | 7,3E-02              | 1,000             | 0,649             |
| 36 | GTACG.CG        |     | 0,995               | 0,827               | 3,354  | 5,1E-05              | 7,6E-04              | 0,038             | 0,103             |
| 37 | TAATA_AT        |     | 0,541               | 0,818               | 2,323  | 9,5E-02              | 1,2E-02              | 1,000             | 0,403             |
| 38 | CTAA_GG         |     | -0,152              | 0,814               | 1,547  | 6,7E-01              | 2,0E-02              | 1,000             | 0,462             |
| 39 | GTAGG_TC        |     | 0,916               | 0,804               | 4,367  | 6,7E-07              | 1,3E-05              | 0,002             | 0,005             |
| 40 | GTGAT_AT        |     | 0,600               | 0,803               | 5,235  | 1,1E-05              | 4,3E-09              | 0,011             | 0,000             |
| 41 | CAGTG_GG        |     | -0,290              | 0,799               | 1,353  | 4,5E-01              | 3,7E-02              | 1,000             | 0,555             |
| 42 | AAACA_TA        |     | -0,453              | 0,797               | 1,470  | 2,1E-01              | 2,5E-02              | 1,000             | 0,506             |
| 43 | CGATA_AG        |     | 0,580               | 0,797               | 1,552  | 1,3E-01              | 3,7E-02              | 1,000             | 0,555             |
| 44 | TAACG_AG        |     | 0,400               | 0,789               | 2,048  | 2,5E-01              | 2,3E-02              | 1,000             | 0,483             |
| 45 | TCATA_AG        |     | 0,618               | 0,788               | 1,929  | 9,0E-02              | 3,1E-02              | 1,000             | 0,535             |
| 46 | CTAAC_GT        |     | 0,797               | 0,786               | 3,954  | 1,0E-04              | 1,3E-04              | 0,063             | 0,029             |
| 47 | CAGGC_GG        |     | 0,203               | 0,786               | 0,336  | 6,0E-01              | 4,1E-02              | 1,000             | 0,574             |
| 48 | CGAGT_AC        |     | -0,118              | 0,783               | 3,480  | 6,3E-01              | 1,5E-03              | 1,000             | 0,160             |
| 49 | CGGTA_GG        |     | 0,398               | 0,781               | 2,675  | 1,9E-01              | 9,6E-03              | 1,000             | 0,383             |
| 50 | GTAAC_GA        |     | 0,503               | 0,776               | 5,690  | 2,6E-05              | 9,4E-11              | 0,021             | 0,000             |

  

| #   | Motif           | K   | logFC<br>25 $\mu$ M | logFC<br>50 $\mu$ M | logCPM | Pvalue<br>25 $\mu$ M | Pvalue<br>50 $\mu$ M | FDR<br>25 $\mu$ M | FDR<br>50 $\mu$ M |
|-----|-----------------|-----|---------------------|---------------------|--------|----------------------|----------------------|-------------------|-------------------|
| 51  | GTAAT_GT        |     | 0,484               | 0,774               | 5,000  | 1,8E-03              | 6,6E-07              | 0,442             | 0,000             |
| 52  | CACCTT_CA       |     | 0,692               | 0,772               | 2,841  | 1,9E-02              | 9,1E-03              | 0,921             | 0,379             |
| 53  | CTTTA.CG        |     | 0,672               | 0,771               | 2,421  | 4,3E-02              | 2,0E-02              | 1,000             | 0,467             |
| 54  | TAGTA_CC        |     | 0,495               | 0,769               | 1,632  | 1,7E-01              | 3,2E-02              | 1,000             | 0,536             |
| 55  | ATGAA_CC        |     | 0,524               | 0,767               | 2,834  | 9,7E-02              | 1,5E-02              | 1,000             | 0,431             |
| 56  | AGTTA_AG        |     | 0,277               | 0,760               | 3,271  | 3,0E-01              | 4,8E-03              | 1,000             | 0,297             |
| 57  | CATCC_GG        |     | 0,443               | 0,758               | 1,230  | 2,8E-01              | 6,5E-02              | 1,000             | 0,635             |
| 58  | CTAGT_GC        |     | 0,685               | 0,756               | 4,858  | 5,6E-06              | 5,6E-07              | 0,008             | 0,000             |
| 59  | GTATC_GT        |     | 0,336               | 0,755               | 5,564  | 5,8E-03              | 5,8E-10              | 0,641             | 0,000             |
| 60  | AGACT_AG        |     | 0,352               | 0,752               | 3,132  | 1,8E-01              | 4,5E-03              | 1,000             | 0,288             |
| 61  | GAAGG.AC        |     | 0,191               | 0,752               | 2,230  | 5,5E-01              | 1,8E-02              | 1,000             | 0,448             |
| 62  | CACAA_CT        |     | 0,997               | 0,750               | 2,293  | 4,6E-03              | 3,3E-02              | 0,599             | 0,541             |
| 63  | AGAAC_AA        |     | 0,419               | 0,749               | 2,080  | 2,3E-01              | 3,2E-02              | 1,000             | 0,536             |
| 64  | GTGAA_TT        |     | 0,607               | 0,747               | 3,806  | 4,7E-03              | 5,2E-04              | 0,611             | 0,083             |
| 65  | TGTTA_AA        |     | -0,131              | 0,747               | 2,498  | 6,6E-01              | 1,2E-02              | 1,000             | 0,408             |
| 66  | <b>GTATC_GG</b> | K5  | 0,527               | 0,744               | 5,897  | 2,7E-05              | 3,2E-09              | 0,021             | 0,000             |
| 67  | CGCGC.AC        |     | 0,599               | 0,743               | 1,772  | 6,3E-02              | 2,1E-02              | 1,000             | 0,475             |
| 68  | GGAGT.AC        |     | 0,767               | 0,738               | 4,363  | 1,5E-05              | 3,2E-05              | 0,014             | 0,010             |
| 69  | CACCT_GG        |     | 0,985               | 0,734               | 1,572  | 1,0E-02              | 5,6E-02              | 0,777             | 0,615             |
| 70  | TATCA_AG        |     | 0,411               | 0,734               | 1,914  | 2,3E-01              | 3,1E-02              | 1,000             | 0,535             |
| 71  | AGTAT_AA        |     | 0,159               | 0,728               | 2,181  | 6,2E-01              | 2,2E-02              | 1,000             | 0,479             |
| 72  | CGTTA_AG        |     | 0,220               | 0,728               | 2,515  | 4,8E-01              | 1,9E-02              | 1,000             | 0,459             |
| 73  | CAATA_AT        |     | 0,344               | 0,725               | 2,119  | 3,1E-01              | 3,4E-02              | 1,000             | 0,543             |
| 74  | TAGAA.AC        |     | 0,337               | 0,723               | 0,564  | 4,0E-01              | 7,3E-02              | 1,000             | 0,649             |
| 75  | CTATA_CC        |     | -0,398              | 0,723               | 1,947  | 2,3E-01              | 2,9E-02              | 1,000             | 0,526             |
| 76  | GTACG_CT        |     | 0,088               | 0,720               | 3,787  | 6,9E-01              | 1,3E-03              | 1,000             | 0,146             |
| 77  | CTAGG_CC        |     | 0,536               | 0,715               | 4,925  | 1,6E-04              | 4,9E-06              | 0,255             | 0,002             |
| 78  | CGCAA_GG        |     | 0,078               | 0,713               | 2,830  | 7,8E-01              | 1,1E-02              | 1,000             | 0,390             |
| 79  | CCAAC_AA        |     | -0,088              | 0,713               | 1,151  | 8,2E-01              | 6,7E-02              | 1,000             | 0,636             |
| 80  | GTGGT_TC        |     | 0,605               | 0,711               | 4,664  | 2,2E-04              | 1,5E-05              | 0,126             | 0,005             |
| 81  | GTGTT_TA        |     | 0,403               | 0,710               | 3,561  | 9,0E-02              | 2,9E-03              | 1,000             | 0,233             |
| 82  | GTAGG_TT        |     | 0,422               | 0,708               | 5,974  | 4,5E-04              | 3,8E-09              | 0,215             | 0,000             |
| 83  | GAGTA_CC        |     | 0,366               | 0,704               | 2,506  | 2,5E-01              | 2,6E-02              | 1,000             | 0,509             |
| 84  | AAAAT_CC        |     | 0,532               | 0,704               | 2,213  | 9,4E-02              | 2,7E-02              | 1,000             | 0,514             |
| 85  | GTGGA_TC        |     | 0,837               | 0,701               | 5,019  | 6,3E-08              | 5,9E-06              | 0,000             | 0,002             |
| 86  | AAAAA.CG        |     | 0,590               | 0,700               | 0,776  | 1,5E-01              | 8,5E-02              | 1,000             | 0,677             |
| 87  | <b>GTAGT_AT</b> | K11 | 0,539               | 0,699               | 4,116  | 9,5E-03              | 7,8E-04              | 0,766             | 0,104             |
| 88  | GCACC_GG        |     | 0,499               | 0,697               | 4,703  | 1,7E-03              | 1,2E-05              | 0,441             | 0,004             |
| 89  | AAGAG_CC        |     | 0,352               | 0,697               | 2,025  | 3,7E-01              | 7,6E-02              | 1,000             | 0,656             |
| 90  | TAATC_AG        |     | 0,987               | 0,696               | 2,221  | 3,8E-03              | 4,1E-02              | 0,552             | 0,574             |
| 91  | AAAAT_AG        |     | -0,265              | 0,695               | 0,833  | 5,6E-01              | 1,3E-01              | 1,000             | 0,724             |
| 92  | GATAT_CT        |     | 0,511               | 0,694               | 3,358  | 3,5E-02              | 4,3E-03              | 0,998             | 0,287             |
| 93  | CTATT_AA        |     | 0,178               | 0,690               | 3,261  | 5,2E-01              | 1,3E-02              | 1,000             | 0,409             |
| 94  | GGTAA_CC        |     | 0,077               | 0,690               | 2,316  | 8,1E-01              | 3,4E-02              | 1,000             | 0,543             |
| 95  | CACCT_GG        |     | -0,498              | 0,689               | 1,771  | 1,6E-01              | 4,8E-02              | 1,000             | 0,606             |
| 96  | CAGCC_GG        |     | 0,276               | 0,688               | 3,694  | 2,2E-01              | 2,2E-03              | 1,000             | 0,200             |
| 97  | TAGTC_AG        |     | 1,218               | 0,685               | 1,578  | 6,2E-04              | 5,4E-02              | 0,255             | 0,614             |
| 98  | GACGC_GC        |     | 0,396               | 0,685               | 1,870  | 2,2E-01              | 3,3E-02              | 1,000             | 0,541             |
| 99  | GTACG.AC        |     | 0,731               | 0,685               | 2,510  | 1,8E-02              | 2,7E-02              | 0,921             | 0,514             |
| 100 | CGATT_CT        |     | 0,528               | 0,684               | 3,019  | 5,1E-02              | 1,2E-02              | 1,000             | 0,403             |

**Tab. 1: Top 100 constructs from the Tet-hammerhead screen, ranked by their fold change at 50  $\mu$ M Tet (here, no further cutoffs were applied). K\* constructs were contained in the original publication by Beilstein and colleagues.**

Supplementary Table 2

| #  | Motif   | GuaM*     | logCPM | logFC<br>30 $\mu$ M | logFC<br>100 $\mu$ M | logFC<br>300 $\mu$ M | P-value<br>30 $\mu$ M | P-value<br>100 $\mu$ M | P-value<br>300 $\mu$ M | FDR<br>30 $\mu$ M | FDR<br>100 $\mu$ M | FDR<br>300 $\mu$ M |
|----|---------|-----------|--------|---------------------|----------------------|----------------------|-----------------------|------------------------|------------------------|-------------------|--------------------|--------------------|
| 1  | TGC_GTA | GuaM8HDV  | 6.68   | -0.971              | -1.325               | -1.492               | 2.20E-16              | 2.20E-16               | 2.20E-16               | 2.05E-14          | 1.50E-14           | 1.07E-14           |
| 2  | TGG_CTA |           | 6.68   | -0.837              | -1.144               | -1.311               | 2.20E-16              | 2.20E-16               | 2.20E-16               | 2.05E-14          | 1.50E-14           | 1.07E-14           |
| 3  | TGA_TTA |           | 8.16   | -0.588              | -1.000               | -1.218               | 2.20E-16              | 2.20E-16               | 2.20E-16               | 2.05E-14          | 1.50E-14           | 1.07E-14           |
| 4  | CGG_CTG |           | 5.19   | -0.768              | -0.926               | -1.129               | 2.20E-16              | 2.20E-16               | 2.20E-16               | 2.05E-14          | 1.50E-14           | 1.07E-14           |
| 5  | CGG_TCG |           | 5.39   | -0.703              | -0.951               | -1.129               | 2.20E-16              | 2.20E-16               | 2.20E-16               | 2.05E-14          | 1.50E-14           | 1.07E-14           |
| 6  | TGT_ATA | GuaM12HDV | 7.58   | -0.447              | -0.852               | -1.121               | 2.20E-16              | 2.20E-16               | 2.20E-16               | 2.05E-14          | 1.50E-14           | 1.07E-14           |
| 7  | CGT_ACG |           | 5.25   | -0.687              | -0.937               | -1.083               | 2.20E-16              | 2.20E-16               | 2.20E-16               | 2.05E-14          | 1.50E-14           | 1.07E-14           |
| 8  | CGC_GCG |           | 3.99   | -0.809              | -1.038               | -1.061               | 2.20E-16              | 2.20E-16               | 2.20E-16               | 2.05E-14          | 1.50E-14           | 1.07E-14           |
| 9  | CGT_GCG |           | 3.83   | -0.728              | -1.014               | -1.050               | 2.20E-16              | 2.20E-16               | 2.20E-16               | 2.05E-14          | 1.50E-14           | 1.07E-14           |
| 10 | CAA_TTG |           | 7.01   | -0.656              | -0.888               | -1.014               | 2.20E-16              | 2.20E-16               | 2.20E-16               | 2.05E-14          | 1.50E-14           | 1.07E-14           |
| 11 | CGC_GTG |           | 4.18   | -0.596              | -0.938               | -0.927               | 2.20E-16              | 2.20E-16               | 2.20E-16               | 2.05E-14          | 1.50E-14           | 1.07E-14           |
| 12 | CAC_GTG |           | 5.50   | -0.594              | -0.736               | -0.881               | 2.20E-16              | 2.20E-16               | 2.20E-16               | 2.05E-14          | 1.50E-14           | 1.07E-14           |
| 13 | CGA_TCG |           | 5.27   | -0.663              | -0.777               | -0.880               | 2.20E-16              | 2.20E-16               | 2.20E-16               | 2.05E-14          | 1.50E-14           | 1.07E-14           |
| 14 | CGA_TTG |           | 6.00   | -0.423              | -0.673               | -0.878               | 2.20E-16              | 2.20E-16               | 2.20E-16               | 2.05E-14          | 1.50E-14           | 1.07E-14           |
| 15 | CGA_CCG |           | 6.76   | -0.303              | -0.678               | -0.877               | 2.20E-16              | 2.20E-16               | 2.20E-16               | 2.05E-14          | 1.50E-14           | 1.07E-14           |
| 16 | CGT_ATG |           | 6.56   | -0.405              | -0.642               | -0.828               | 2.20E-16              | 2.20E-16               | 2.20E-16               | 2.05E-14          | 1.50E-14           | 1.07E-14           |
| 17 | CGG_CCG |           | 4.35   | -0.591              | -0.845               | -0.800               | 2.20E-16              | 2.20E-16               | 2.20E-16               | 2.05E-14          | 1.50E-14           | 1.07E-14           |
| 18 | CGC_ACG |           | 6.06   | -0.221              | -0.540               | -0.798               | 1.22E-08              | 2.20E-16               | 2.20E-16               | 9.27E-07          | 1.50E-14           | 1.07E-14           |
| 19 | CCA_TGG |           | 4.14   | -0.527              | -0.648               | -0.780               | 2.20E-16              | 2.20E-16               | 2.20E-16               | 2.05E-14          | 1.50E-14           | 1.07E-14           |
| 20 | CAT_ATG |           | 5.97   | -0.495              | -0.614               | -0.756               | 2.20E-16              | 2.20E-16               | 2.20E-16               | 2.05E-14          | 1.50E-14           | 1.07E-14           |
| 21 | CAG_CTG |           | 5.60   | -0.494              | -0.612               | -0.739               | 2.20E-16              | 2.20E-16               | 2.20E-16               | 2.05E-14          | 1.50E-14           | 1.07E-14           |
| 22 | TGG_TTA |           | 8.13   | -0.243              | -0.480               | -0.733               | 2.20E-16              | 2.20E-16               | 2.20E-16               | 2.05E-14          | 1.50E-14           | 1.07E-14           |
| 23 | CGG_TGG |           | 3.92   | -0.440              | -0.534               | -0.732               | 1.08E-10              | 7.56E-15               | 2.20E-16               | 8.81E-09          | 4.92E-13           | 1.07E-14           |
| 24 | CGA_GCG |           | 6.22   | -0.095              | -0.436               | -0.718               | 1.01E-02              | 2.20E-16               | 2.20E-16               | 2.36E-01          | 1.50E-14           | 1.07E-14           |
| 25 | CAG_TTG |           | 6.39   | -0.283              | -0.519               | -0.696               | 2.20E-16              | 2.20E-16               | 2.20E-16               | 2.05E-14          | 1.50E-14           | 1.07E-14           |
| 26 | TGT_ACA |           | 8.08   | -0.430              | -0.555               | -0.682               | 2.20E-16              | 2.20E-16               | 2.20E-16               | 2.05E-14          | 1.50E-14           | 1.07E-14           |
| 27 | CAT_GTG |           | 5.76   | -0.317              | -0.494               | -0.680               | 2.20E-16              | 2.20E-16               | 2.20E-16               | 2.05E-14          | 1.50E-14           | 1.07E-14           |
| 28 | CGG_GCG |           | 4.83   | -0.144              | -0.387               | -0.675               | 4.08E-03              | 3.47E-14               | 2.20E-16               | 1.38E-01          | 2.18E-12           | 1.07E-14           |
| 29 | CGT_CCG |           | 5.63   | -0.218              | -0.429               | -0.664               | 1.05E-07              | 2.20E-16               | 2.20E-16               | 7.65E-06          | 1.50E-14           | 1.07E-14           |
| 30 | CTA_TAG |           | 7.42   | -0.431              | -0.563               | -0.636               | 2.20E-16              | 2.20E-16               | 2.20E-16               | 2.05E-14          | 1.50E-14           | 1.07E-14           |
| 31 | TGT_GCA |           | 7.39   | -0.319              | -0.501               | -0.636               | 2.20E-16              | 2.20E-16               | 2.20E-16               | 2.05E-14          | 1.50E-14           | 1.07E-14           |
| 32 | CGG_TTG |           | 6.57   | -0.163              | -0.378               | -0.601               | 1.38E-09              | 2.20E-16               | 2.20E-16               | 1.09E-07          | 1.50E-14           | 1.07E-14           |
| 33 | CGT_TCG |           | 6.15   | -0.163              | -0.449               | -0.599               | 5.22E-08              | 2.20E-16               | 2.20E-16               | 3.89E-06          | 1.50E-14           | 1.07E-14           |
| 34 | TGA_TCA |           | 8.43   | -0.425              | -0.561               | -0.597               | 2.20E-16              | 2.20E-16               | 2.20E-16               | 2.05E-14          | 1.50E-14           | 1.07E-14           |
| 35 | CAG_CCG |           | 6.57   | -0.242              | -0.509               | -0.595               | 2.20E-16              | 2.20E-16               | 2.20E-16               | 2.05E-14          | 1.50E-14           | 1.07E-14           |
| 36 | TGC_GCA |           | 6.83   | -0.461              | -0.591               | -0.579               | 2.20E-16              | 2.20E-16               | 2.20E-16               | 2.05E-14          | 1.50E-14           | 1.07E-14           |
| 37 | CGG_ACG |           | 6.36   | -0.117              | -0.357               | -0.560               | 2.92E-05              | 2.20E-16               | 2.20E-16               | 1.96E-03          | 1.50E-14           | 1.07E-14           |
| 38 | TCA_TGA |           | 7.11   | -0.391              | -0.523               | -0.549               | 2.20E-16              | 2.20E-16               | 2.20E-16               | 2.05E-14          | 1.50E-14           | 1.07E-14           |
| 39 | TCG_TGA |           | 6.22   | -0.286              | -0.418               | -0.536               | 2.20E-16              | 2.20E-16               | 2.20E-16               | 2.05E-14          | 1.50E-14           | 1.07E-14           |
| 40 | CTC_GAG |           | 5.91   | -0.317              | -0.449               | -0.502               | 2.20E-16              | 2.20E-16               | 2.20E-16               | 2.05E-14          | 1.50E-14           | 1.07E-14           |
| 41 | CCT_AGG |           | 5.93   | -0.382              | -0.448               | -0.492               | 2.20E-16              | 2.20E-16               | 2.20E-16               | 2.05E-14          | 1.50E-14           | 1.07E-14           |
| 42 | CGA_ACG |           | 6.24   | -0.091              | -0.190               | -0.470               | 1.21E-02              | 1.82E-07               | 2.20E-16               | 2.51E-01          | 8.98E-06           | 1.07E-14           |
| 43 | CAC_GCG |           | 4.53   | -0.320              | -0.397               | -0.466               | 8.29E-09              | 1.33E-12               | 2.20E-16               | 6.41E-07          | 8.00E-11           | 1.07E-14           |
| 44 | CCG_CGG |           | 3.35   | -0.182              | -0.310               | -0.460               | 1.99E-02              | 8.69E-05               | 7.02E-09               | 3.36E-01          | 2.95E-03           | 2.55E-07           |
| 45 | CCT_GGG |           | 5.14   | -0.167              | -0.412               | -0.456               | 1.41E-03              | 7.93E-15               | 2.20E-16               | 6.08E-02          | 5.08E-13           | 1.07E-14           |
| 46 | TCC_GGA |           | 6.52   | -0.299              | -0.392               | -0.447               | 2.20E-16              | 2.20E-16               | 2.20E-16               | 2.05E-14          | 1.50E-14           | 1.07E-14           |
| 47 | TGG_TCA |           | 7.66   | -0.259              | -0.362               | -0.444               | 2.20E-16              | 2.20E-16               | 2.20E-16               | 2.05E-14          | 1.50E-14           | 1.07E-14           |
| 48 | CTT_AAG |           | 7.76   | -0.258              | -0.363               | -0.443               | 2.20E-16              | 2.20E-16               | 2.20E-16               | 2.05E-14          | 1.50E-14           | 1.07E-14           |
| 49 | CGC_TCG |           | 4.83   | -0.143              | -0.263               | -0.437               | 7.64E-03              | 1.09E-06               | 9.71E-16               | 2.09E-01          | 4.85E-05           | 4.57E-14           |
| 50 | TCT_AGA |           | 7.55   | -0.273              | -0.374               | -0.422               | 2.20E-16              | 2.20E-16               | 2.20E-16               | 2.05E-14          | 1.50E-14           | 1.07E-14           |
| 51 | TTC_GTA |           | 7.83   | -0.174              | -0.319               | -0.418               | 2.20E-16              | 2.20E-16               | 2.20E-16               | 2.05E-14          | 1.50E-14           | 1.07E-14           |
| 52 | TAA_TTA | GuaM7HDV  | 8.82   | -0.186              | -0.323               | -0.394               | 2.20E-16              | 2.20E-16               | 2.20E-16               | 2.05E-14          | 1.50E-14           | 1.07E-14           |
| 53 | CCC_GGG |           | 5.65   | -0.305              | -0.435               | -0.394               | 2.20E-16              | 2.20E-16               | 2.20E-16               | 2.05E-14          | 1.50E-14           | 1.07E-14           |
| 54 | CCT_TGG |           | 6.37   | -0.074              | -0.279               | -0.385               | 2.11E-02              | 2.20E-16               | 2.20E-16               | 3.40E-01          | 1.50E-14           | 1.07E-14           |
| 55 | TCG_CGA |           | 6.31   | -0.275              | -0.394               | -0.371               | 4.27E-12              | 2.20E-16               | 2.20E-16               | 3.64E-10          | 1.50E-14           | 1.07E-14           |
| 56 | CGC_CCG |           | 4.58   | -0.157              | -0.260               | -0.364               | 1.99E-02              | 1.21E-04               | 8.24E-08               | 3.36E-01          | 3.87E-03           | 2.84E-06           |
| 57 | CCA_CGG |           | 5.34   | -0.067              | -0.161               | -0.356               | 1.65E-01              | 9.35E-04               | 4.04E-13               | 7.32E-01          | 2.29E-02           | 1.78E-11           |
| 58 | TCT_GGA |           | 7.51   | -0.087              | -0.208               | -0.342               | 1.29E-04              | 2.20E-16               | 2.20E-16               | 8.01E-03          | 1.50E-14           | 1.07E-14           |
| 59 | TGT_GTA | GuaM11HDV | 8.05   | -0.059              | -0.185               | -0.341               | 9.72E-04              | 2.20E-16               | 2.20E-16               | 4.37E-02          | 1.50E-14           | 1.07E-14           |
| 60 | TAC_GTA | GuaM1HDV  | 7.24   | -0.240              | -0.286               | -0.336               | 2.20E-16              | 2.20E-16               | 2.20E-16               | 2.05E-14          | 1.50E-14           | 1.07E-14           |

**Tab. 2: Top 60 constructs from the Gua-HDV screen, ranked by their fold change at 300  $\mu$ M Gua** (here, no further cutoffs were applied). GuaM\* constructs were contained in the original publication by Nomura and colleagues.

## Supplementary Table 3

| Sub-Library | #  | Motif   | logCPM | log2FC  | log2FC | log2FC | p value  | p value  | p value  | FDR      | FDR      | FDR      |
|-------------|----|---------|--------|---------|--------|--------|----------|----------|----------|----------|----------|----------|
|             |    |         |        | 12.5 μM | 25 μM  | 50 μM  | 12.5 μM  | 25 μM    | 50 μM    | 12.5 μM  | 25 μM    | 50 μM    |
| 2N3N        | 1  | CG_CGG  | 7,718  | -0,808  | -0,856 | -1,043 | 1,15E-10 | 7,88E-12 | 7,20E-17 | 5,86E-08 | 8,07E-09 | 3,69E-14 |
|             | 2  | GG_CCA  | 7,933  | -0,429  | -0,532 | -0,916 | 7,02E-04 | 2,65E-05 | 5,81E-13 | 1,24E-02 | 5,42E-03 | 7,44E-11 |
|             | 3  | GG_CCG  | 7,800  | -0,553  | -0,580 | -0,908 | 5,05E-07 | 1,27E-07 | 1,56E-16 | 3,77E-05 | 4,34E-05 | 3,99E-14 |
|             | 4  | CG_CGC  | 7,666  | -0,650  | -0,451 | -0,804 | 6,46E-08 | 1,50E-04 | 1,60E-11 | 8,06E-06 | 2,20E-02 | 1,64E-09 |
|             | 5  | CG_CGA  | 7,299  | -0,832  | -0,771 | -0,755 | 1,99E-10 | 2,98E-09 | 4,19E-09 | 6,81E-08 | 1,53E-06 | 2,68E-07 |
|             | 6  | CC_GGT  | 7,966  | -0,528  | -0,243 | -0,697 | 1,57E-06 | 2,55E-02 | 1,83E-10 | 8,92E-05 | 4,95E-01 | 1,25E-08 |
|             | 7  | CG_CGT  | 6,538  | -0,614  | -0,526 | -0,656 | 3,57E-04 | 2,05E-03 | 1,11E-04 | 7,46E-03 | 1,34E-01 | 1,23E-03 |
|             | 8  | GC_GCG  | 9,099  | -0,361  | -0,342 | -0,624 | 3,19E-06 | 9,65E-06 | 6,33E-16 | 1,63E-04 | 2,47E-03 | 1,30E-13 |
|             | 9  | GA_TCG  | 8,641  | -0,480  | -0,276 | -0,620 | 6,61E-07 | 4,02E-03 | 1,09E-10 | 3,98E-05 | 1,96E-01 | 8,61E-09 |
|             | 10 | TC_CTG  | 9,973  | -0,103  | -0,017 | -0,580 | 1,83E-01 | 8,28E-01 | 9,21E-14 | 4,34E-01 | 9,68E-01 | 1,35E-11 |
| 3N3N        | 1  | ACG_CG  | 6,553  | -1,380  | -1,178 | -1,545 | 6,15E-24 | 1,54E-18 | 2,51E-30 | 6,30E-21 | 5,27E-16 | 2,57E-27 |
|             | 2  | CGG_CC  | 7,354  | -0,763  | -0,804 | -1,389 | 6,43E-08 | 1,13E-08 | 2,52E-22 | 9,40E-06 | 1,65E-06 | 6,45E-20 |
|             | 3  | AAG_CT  | 7,061  | -1,043  | -1,139 | -1,297 | 9,00E-16 | 1,49E-18 | 9,78E-24 | 4,61E-13 | 5,27E-16 | 3,34E-21 |
|             | 4  | GCG_CG  | 7,879  | -0,698  | -0,747 | -1,178 | 6,25E-10 | 3,32E-11 | 3,23E-25 | 1,72E-07 | 6,81E-09 | 1,65E-22 |
|             | 5  | ACC_GG  | 7,172  | -0,790  | -0,648 | -0,979 | 1,61E-09 | 5,91E-07 | 5,10E-14 | 3,31E-07 | 4,32E-05 | 5,23E-12 |
|             | 6  | GTG_CC  | 7,381  | -0,534  | -0,700 | -0,973 | 5,17E-05 | 1,16E-07 | 1,85E-13 | 1,41E-03 | 1,19E-05 | 1,72E-11 |
|             | 7  | GCC_GG  | 7,462  | -0,779  | -0,822 | -0,939 | 1,44E-08 | 1,96E-09 | 6,38E-12 | 2,46E-06 | 3,35E-07 | 5,03E-10 |
|             | 8  | AGC_GC  | 7,215  | -0,621  | -0,860 | -0,921 | 2,58E-07 | 1,19E-12 | 1,74E-14 | 2,20E-05 | 3,05E-10 | 1,98E-12 |
|             | 9  | CCG_CG  | 9,043  | -0,299  | -0,295 | -0,902 | 2,63E-03 | 2,89E-03 | 1,85E-19 | 3,02E-02 | 7,97E-02 | 3,80E-17 |
|             | 10 | GGC_GC  | 7,465  | -0,637  | -0,538 | -0,879 | 1,54E-05 | 2,37E-04 | 2,18E-09 | 5,43E-04 | 1,01E-02 | 9,69E-08 |
| 3N3N        | 1  | GCG_CGT | 4,243  | -0,999  | -1,208 | -2,150 | 1,35E-04 | 4,17E-06 | 5,19E-15 | 1,88E-02 | 5,18E-03 | 2,13E-11 |
|             | 2  | GTG_TAC | 4,744  | -0,665  | -0,658 | -2,017 | 1,26E-02 | 1,28E-02 | 6,51E-13 | 1,96E-01 | 4,91E-01 | 6,67E-10 |
|             | 3  | GAG_CTT | 4,885  | -0,960  | -1,132 | -1,579 | 3,06E-05 | 9,64E-07 | 1,35E-11 | 8,97E-03 | 2,88E-03 | 9,21E-09 |
|             | 4  | ACG_CGG | 5,579  | -1,037  | -1,023 | -1,557 | 3,18E-05 | 3,71E-05 | 6,32E-10 | 8,97E-03 | 1,90E-02 | 2,27E-07 |
|             | 5  | GGG_CTC | 3,384  | -0,784  | -0,322 | -1,544 | 1,48E-02 | 2,95E-01 | 2,36E-06 | 2,04E-01 | 9,26E-01 | 1,90E-04 |
|             | 6  | CCG_TGG | 5,987  | -0,723  | -0,602 | -1,369 | 1,35E-04 | 1,32E-03 | 1,03E-12 | 1,88E-02 | 1,29E-01 | 8,47E-10 |
|             | 7  | TGG_CTA | 4,911  | -1,002  | -0,767 | -1,343 | 4,09E-05 | 1,38E-03 | 3,61E-08 | 8,97E-03 | 1,29E-01 | 5,48E-06 |
|             | 8  | CGA_TTG | 5,561  | -0,593  | -0,469 | -1,292 | 4,31E-03 | 2,26E-02 | 8,95E-10 | 1,14E-01 | 5,54E-01 | 2,63E-07 |
|             | 9  | TGC_GTA | 5,699  | -0,341  | -0,421 | -1,275 | 1,21E-01 | 5,50E-02 | 1,49E-08 | 5,51E-01 | 7,26E-01 | 2,77E-06 |
|             | 10 | CTG_CAG | 4,401  | -0,858  | -0,788 | -1,271 | 5,22E-04 | 1,25E-03 | 2,91E-07 | 3,69E-02 | 1,25E-01 | 3,41E-05 |
| CG_2N3N     | 1  | CG_CGA  | 7,013  | -0,868  | -1,000 | -1,658 | 2,13E-06 | 4,41E-08 | 6,76E-19 | 2,96E-04 | 9,04E-06 | 2,31E-16 |
|             | 2  | CG_CGG  | 8,119  | -1,059  | -1,279 | -1,634 | 4,22E-14 | 9,29E-20 | 1,07E-30 | 4,32E-11 | 9,51E-17 | 1,09E-27 |
|             | 3  | CG_CTG  | 6,517  | -0,416  | 0,017  | -0,993 | 4,46E-02 | 9,34E-01 | 2,06E-06 | 2,14E-01 | 9,96E-01 | 6,20E-05 |
|             | 4  | CG_CGC  | 7,709  | -0,641  | -0,568 | -0,965 | 7,93E-06 | 6,52E-05 | 1,65E-11 | 5,07E-04 | 5,13E-03 | 1,87E-09 |
|             | 5  | CA_TGG  | 8,928  | -0,693  | -0,618 | -0,887 | 3,56E-10 | 1,83E-08 | 7,83E-16 | 1,22E-07 | 4,68E-06 | 1,60E-13 |
|             | 6  | GA_TCA  | 7,259  | -0,381  | -0,362 | -0,811 | 2,21E-02 | 2,87E-02 | 1,16E-06 | 1,37E-01 | 4,41E-01 | 3,83E-05 |
|             | 7  | CG_CGT  | 7,647  | -0,761  | -0,526 | -0,772 | 4,25E-06 | 1,30E-03 | 2,38E-06 | 3,35E-04 | 5,12E-02 | 6,95E-05 |
|             | 8  | GG_CTG  | 7,987  | -0,522  | -0,562 | -0,758 | 1,02E-03 | 3,92E-04 | 1,70E-06 | 1,96E-02 | 2,36E-02 | 5,43E-05 |
|             | 9  | TG_CAG  | 10,113 | -0,352  | -0,543 | -0,749 | 2,03E-06 | 2,48E-13 | 5,86E-24 | 2,96E-04 | 1,27E-10 | 3,00E-21 |
|             | 10 | AG_TGC  | 10,827 | 0,006   | 0,042  | -0,708 | 9,45E-01 | 6,19E-01 | 1,76E-16 | 9,81E-01 | 9,62E-01 | 4,50E-14 |
| CG_3N3N     | 1  | GAG_CC  | 5,244  | -0,653  | -0,804 | -1,593 | 1,51E-03 | 8,61E-05 | 6,56E-14 | 1,60E-02 | 3,27E-03 | 5,17E-12 |
|             | 2  | CCG_CG  | 7,089  | -0,688  | -0,799 | -1,462 | 1,95E-06 | 2,95E-08 | 3,03E-23 | 8,70E-05 | 4,32E-06 | 7,75E-21 |
|             | 3  | CGG_CC  | 6,660  | -0,812  | -0,741 | -1,358 | 6,40E-07 | 4,23E-06 | 1,35E-16 | 3,45E-05 | 2,40E-04 | 1,97E-14 |
|             | 4  | GCG_CC  | 6,370  | -1,157  | -1,468 | -1,245 | 4,45E-10 | 3,87E-15 | 8,83E-12 | 5,70E-08 | 2,24E-12 | 5,65E-10 |
|             | 5  | CAG_CT  | 8,381  | -0,774  | -0,709 | -1,244 | 5,79E-12 | 2,07E-10 | 2,99E-28 | 1,97E-09 | 5,30E-08 | 1,53E-25 |
|             | 6  | CGT_CG  | 8,188  | -0,500  | -0,652 | -1,226 | 1,80E-05 | 2,17E-08 | 3,34E-25 | 6,83E-04 | 3,71E-06 | 1,14E-22 |
|             | 7  | CGA_TC  | 8,501  | -0,572  | -0,555 | -0,963 | 1,71E-07 | 3,31E-07 | 1,33E-18 | 1,35E-05 | 2,83E-05 | 2,72E-16 |
|             | 8  | ACG_CG  | 7,152  | -0,779  | -0,580 | -0,954 | 7,54E-08 | 4,67E-05 | 2,87E-11 | 7,02E-06 | 1,91E-03 | 1,55E-09 |
|             | 9  | GAA_TC  | 5,711  | -0,590  | -0,619 | -0,945 | 1,99E-03 | 1,03E-03 | 6,29E-07 | 1,88E-02 | 2,93E-02 | 1,43E-05 |
|             | 10 | CTG_CA  | 8,284  | -0,460  | -0,516 | -0,940 | 6,96E-05 | 7,43E-06 | 5,51E-16 | 1,84E-03 | 3,62E-04 | 5,64E-14 |
| CG_3N3N     | 1  | GAC_GGC | 4,558  | -1,282  | -1,874 | -2,358 | 2,98E-04 | 2,34E-07 | 2,02E-10 | 3,49E-02 | 6,85E-05 | 5,69E-08 |
|             | 2  | GGT_TCC | 3,535  | -1,260  | -0,577 | -2,279 | 3,65E-03 | 1,61E-01 | 5,30E-07 | 1,13E-01 | 7,66E-01 | 4,17E-05 |
|             | 3  | GGC_GGC | 5,555  | -1,233  | -1,342 | -2,250 | 5,87E-05 | 1,16E-05 | 1,47E-12 | 1,34E-02 | 1,89E-03 | 6,67E-10 |
|             | 4  | GGG_CAC | 4,242  | -1,291  | -1,254 | -2,049 | 3,21E-04 | 3,90E-04 | 2,80E-08 | 3,55E-02 | 3,33E-02 | 4,24E-06 |
|             | 5  | GTC_GCC | 4,769  | -0,673  | -0,657 | -2,025 | 5,48E-02 | 5,84E-02 | 3,94E-08 | 3,49E-01 | 5,64E-01 | 5,21E-06 |
|             | 6  | CCG_CTG | 4,961  | -1,093  | -1,067 | -1,927 | 5,66E-04 | 6,67E-04 | 2,74E-09 | 4,73E-02 | 4,80E-02 | 5,61E-07 |
|             | 7  | GTC_GTC | 3,949  | -1,261  | -1,318 | -1,900 | 1,54E-03 | 8,32E-04 | 2,67E-06 | 7,83E-02 | 5,59E-02 | 1,56E-04 |
|             | 8  | GAG_CGC | 4,656  | -1,436  | -1,386 | -1,868 | 2,48E-04 | 3,51E-04 | 2,05E-06 | 3,28E-02 | 3,13E-02 | 1,25E-04 |
|             | 9  | CCG_CAG | 7,707  | -0,980  | -1,165 | -1,852 | 1,06E-08 | 1,16E-11 | 4,61E-26 | 4,36E-05 | 3,88E-08 | 1,89E-22 |
|             | 10 | GTG_CTC | 4,020  | -1,415  | -1,162 | -1,838 | 5,63E-04 | 3,55E-03 | 7,14E-06 | 4,73E-02 | 1,45E-01 | 3,25E-04 |
| noCG_2N3N   | 1  | CT_GCG  | 9,823  | -0,216  | -0,046 | -0,730 | 3,18E-03 | 5,27E-01 | 8,85E-23 | 5,93E-02 | 9,88E-01 | 1,46E-20 |
|             | 2  | CT_AGC  | 10,795 | -0,127  | -0,084 | -0,686 | 3,88E-02 | 1,71E-01 | 8,11E-29 | 2,78E-01 | 9,72E-01 | 8,31E-26 |
|             | 3  | CT_GGT  | 10,832 | -0,200  | -0,109 | -0,634 | 1,77E-02 | 1,97E-01 | 6,11E-14 | 1,93E-01 | 9,77E-01 | 6,25E-12 |
|             | 4  | TC_GGT  | 9,970  | -0,455  | -0,087 | -0,614 | 3,22E-13 | 1,57E-01 | 4,85E-23 | 1,65E-10 | 9,59E-01 | 1,65E-20 |
|             | 5  | CC_GGT  | 9,476  | -0,700  | -0,363 | -0,614 | 2,31E-15 | 3,29E-05 | 2,28E-12 | 2,37E-12 | 2,06E-02 | 1,55E-10 |
|             | 6  | CA_TGC  | 10,526 | -0,034  | 0,027  | -0,596 | 6,67E-01 | 7,39E-01 | 1,06E-13 | 8,60E-01 | 9,88E-01 | 9,89E-12 |
|             | 7  | CT_TGT  | 9,719  | -0,105  | -0,158 | -0,564 | 2,24E-01 | 6,70E-02 | 6,69E-11 | 5,71E-01 | 9,06E-01 | 3,26E-09 |
|             | 8  | CA_TGT  | 10,082 | -0,137  | -0,101 | -0,562 | 1,24E-01 | 2,57E-01 | 3,63E-10 | 4,57E-01 | 9,88E-01 | 1,49E-08 |
|             | 9  | AC_AGC  | 10,895 | -0,246  | -0,089 | -0,556 | 7,21E-05 | 1,51E-01 | 2,83E-19 | 4,10E-03 | 9,59E-01 | 7,25E-17 |
|             | 10 | AC_GGC  | 11,689 | -0,523  | -0,130 | -0,547 | 6,77E-13 | 7,35E-02 | 5,05E-14 | 2,31E-10 | 9,16E-01 | 5,75E-12 |
| noCG_3N3N   | 1  | AGG_CC  | 7,795  | -0,647  | -0,729 | -0,968 | 1,97E-08 | 2,29E-10 | 3,31E-17 | 1,91E-05 | 2,35E-07 | 3,38E-14 |
|             | 2  | AGC_GC  | 8,031  | -0,543  | -0,467 | -0,649 | 6,14E-07 | 1,59E-05 | 1,70E-09 | 9,09E-05 | 8,14E-03 | 1,25E-07 |
|             | 3  | CGG_CC  | 9,553  | -0,268  | -0,158 | -0,621 | 1,46E-03 | 6,05E-02 | 1,64E-13 | 3,65E-02 | 6,88E-01 | 8,38E-11 |
|             | 4  | AGA_TC  | 8,033  | -0,431  | -0,451 | -0,529 | 6,80E-05 | 2,91E-05 | 8,01E-07 | 3,48E-03 | 9,95E-03 | 2,83E-05 |
|             | 5  | ATC_GG  | 10,023 | -0,371  | -0,217 | -0,528 | 8,16E-07 | 3,74E-03 | 1,60E-12 | 1,05E-04 | 2,74E-01 | 3,32E-10 |
|             | 6  | ACC_GG  | 9,809  | -0,464  | -0,330 | -0,519 | 3,73E-08 | 8,40E-05 | 5,90E-10 | 1,91E-05 | 2,15E-02 | 5,49E-08 |
|             | 7  | TCA_GG  | 10,522 | -0,325  | -0,064 | -0,505 | 6,01E-06 | 3,70E-01 | 1,62E-12 | 5,46E-04 | 9,60E-01 | 3,32E-10 |
|             | 8  | CCT_AG  | 9,374  | -0,195  | -0,152 | -0,498 | 1,90E-02 | 6,78E-02 | 2,17E-09 | 2,02E-01 | 6,88E-01 | 1,48E-07 |
|             | 9  | GGT_CC  | 4,997  | -0,266  | 0,250  | -0,493 | 1,58E-01 | 1,64E-01 | 7,21E-03 | 5,55E-01 | 9,30E-01 | 4,47E-02 |
|             | 10 | AGA_GC  | 10,135 | -0,102  | -0,067 | -0,480 | 1,27E-01 | 3,13E-01 | 7,42E-13 | 4,95E-01 | 9,60E-01 | 2,53E-10 |
| noCG_3N3N   | 1  | GGG_TCC | 5,214  | -0,676  | -1,121 | -1,673 | 1,78E-03 | 3,35E-07 | 6,09E-14 | 1,46E-01 | 3,43E-04 | 6,24E-11 |
|             | 2  | GGG_CTC | 6,241  | -0,663  | -0,774 | -1,517 | 3,63E-04 | 3,09E-05 | 1,23E-15 | 5,30E-02 | 1,58E-02 | 2,52E-12 |
|             | 3  | GCC_GGC | 5,011  | -0,545  | -0,758 | -1,315 | 1,43E-02 | 6,82E-04 | 6,23E-09 | 4,00E-01 | 1,86E-01 | 2,55E-06 |
|             | 4  | AGC_GCT | 4,827  | -0,692  | -0,528 | -1,260 | 2,85E-03 | 2,08E-02 | 6,86E-08 | 2,04E-01 | 8,26E-01 | 1,90E-05 |
|             | 5  | GAA_TTC | 4,790  | -1,345  | -1,532 | -1,250 | 2,08E-07 | 4,05E-09 | 6,54E-07 | 4,03E-04 | 8,30E-06 | 1,22E-04 |
|             | 6  | TGA_TCA | 4,588  | -0,435  | -0,894 | -1,146 | 9,18E-02 | 6,56E-04 | 1,14E-05 | 6,59E-01 | 1,86E-01 | 9,18E-04 |
|             | 7  | GTG_CAC | 5,700  | -0,747  | -1,201 | -1,122 | 1,38E-04 | 1,58E-09 | 9,67E-09 | 3,23E-02 | 6,47E-06 |          |

## Supplementary Table 4

### Gua-HDV ribozyme library and hit validation

| Name                         | Sequence                                                                      | Comment                                                                                                              |
|------------------------------|-------------------------------------------------------------------------------|----------------------------------------------------------------------------------------------------------------------|
| Gua-HDV ribozyme library fwd | ttctaccgggacccgtaaatgtccgactaNNNqcaatggagcgcacaaactct                         | Insertion of guanine xpt aptamer into HDV ribozyme with randomized communication module                              |
| Gua-HDV ribozyme library rev | cttggtgccatccacgggatataNNNtggccagccggcg                                       |                                                                                                                      |
| HDV act fwd                  | gaggggacccgctccctccgtaattggcgaatggagcgcacaaactctctagcaacaacaagcctggtaattgttat | Insertion of HDV ribozyme                                                                                            |
| HDV act rev                  | ggaatgttccccagccggcgccagcggagggctggaccatgccggcctttgtttgttggagctgggaatacag     |                                                                                                                      |
| HDV inact fwd                | tgaatggagcgcacaaactctctcag                                                    | Inactivation of HDV ribozyme                                                                                         |
| HDV inact rev                | ccattaccgggggagcgt                                                            |                                                                                                                      |
| GuaM8HDV fwd                 | ttctaccgggacccgtaaatgtccgactaGTAgcaatggagcgcacaaactct                         | Insertion of guanine xpt aptamer into HDV ribozyme with GuaM8HDV communication module                                |
| GuaM8HDV rev                 | cttggtgccatccacgggatataGCAAttggccagccggcg                                     |                                                                                                                      |
| GuaB1HDV fwd                 | ttctaccgggacccgtaaatgtccgactaCTAgcaatggagcgcacaaactct                         | Insertion of guanine xpt aptamer into HDV ribozyme with GuaB1HDV communication module                                |
| GuaB1HDV rev                 | cttggtgccatccacgggatataCATTggccagccggcg                                       |                                                                                                                      |
| GuaB2HDV fwd                 | ttctaccgggacccgtaaatgtccgactaTTAgcaatggagcgcacaaactct                         | Insertion of guanine xpt aptamer into HDV ribozyme with GuaB2HDV communication module                                |
| GuaB2HDV rev                 | cttggtgccatccacgggatataTCAAttggccagccggcg                                     |                                                                                                                      |
| GuaB3HDV fwd                 | ttctaccgggacccgtaaatgtccgactaCTGcaatggagcgcacaaactct                          | Insertion of guanine xpt aptamer into HDV ribozyme with GuaB3HDV communication module                                |
| GuaB3HDV rev                 | cttggtgccatccacgggatataCCGttggccagccggcg                                      |                                                                                                                      |
| GuaB4HDV fwd                 | ttctaccgggacccgtaaatgtccgactaTCGcaatggagcgcacaaactct                          | Insertion of guanine xpt aptamer into HDV ribozyme with GuaB4HDV communication module                                |
| GuaB4HDV rev                 | cttggtgccatccacgggatataCCGttggccagccggcg                                      |                                                                                                                      |
| GuaM12HDV fwd                | ttctaccgggacccgtaaatgtccgactaATAgcaatggagcgcacaaactct                         | Insertion of guanine xpt aptamer into HDV ribozyme with GuaM12HDV communication module                               |
| GuaM12HDV rev                | cttggtgccatccacgggatataACAttggccagccggcg                                      |                                                                                                                      |
| GuaB5HDV fwd                 | ttctaccgggacccgtaaatgtccgactaACGcaatggagcgcacaaactct                          | Insertion of guanine xpt aptamer into HDV ribozyme with GuaB5HDV communication module                                |
| GuaB5HDV rev                 | cttggtgccatccacgggatataACGttggccagccggcg                                      |                                                                                                                      |
| GuaB6HDV fwd                 | ttctaccgggacccgtaaatgtccgactaGCGcaatggagcgcacaaactct                          | Insertion of guanine xpt aptamer into HDV ribozyme with GuaB6HDV communication module                                |
| GuaB6HDV rev                 | cttggtgccatccacgggatataGCGttggccagccggcg                                      |                                                                                                                      |
| GuaB7HDV fwd                 | ttctaccgggacccgtaaatgtccgactaGCGcaatggagcgcacaaactct                          | Insertion of guanine xpt aptamer into HDV ribozyme with GuaB7HDV communication module                                |
| GuaB7HDV rev                 | cttggtgccatccacgggatataACGttggccagccggcg                                      |                                                                                                                      |
| GuaB8HDV fwd                 | ttctaccgggacccgtaaatgtccgactaTTGcaatggagcgcacaaactct                          | Insertion of guanine xpt aptamer into HDV ribozyme with GuaB8HDV communication module                                |
| GuaB8HDV rev                 | cttggtgccatccacgggatataTTGttggccagccggcg                                      |                                                                                                                      |
| GuaB9HDV fwd                 | ttctaccgggacccgtaaatgtccgactaGTGcaatggagcgcacaaactct                          | Insertion of guanine xpt aptamer into HDV ribozyme with GuaB9HDV communication module                                |
| GuaB9HDV rev                 | cttggtgccatccacgggatataGTGttggccagccggcg                                      |                                                                                                                      |
| GuaB10HDV fwd                | ttctaccgggacccgtaaatgtccgactaGTGcaatggagcgcacaaactct                          | Insertion of guanine xpt aptamer into HDV ribozyme with GuaB10HDV communication module                               |
| GuaB10HDV rev                | cttggtgccatccacgggatataGTGttggccagccggcg                                      |                                                                                                                      |
| Ampl fwd                     | agataaagcttggtaaccattgcaagcgtatt                                              | Insertion of the constructs into CMV-eGFP pAAV expression plasmid backbone using HindIII and BglII restriction sites |
| Ampl rev                     | agataaagcttgaaggataacaatttaccaggc                                             |                                                                                                                      |

### Gua-HHR ribozyme library and hit validation

| Name                         | Sequence                                                      | Comment                                                                                                              |
|------------------------------|---------------------------------------------------------------|----------------------------------------------------------------------------------------------------------------------|
| Gua-HHR ribozyme library fwd | ttctaccgggacccgtaaatgtccgactaNNtaccatccagctgatgagcccaaatagg   | Insertion of guanine xpt aptamer into HHR ribozyme with randomized communication module                              |
| Gua-HHR ribozyme library rev | cttggtgccatccacgggatataNNNNgaatccagagccgctcttg                |                                                                                                                      |
| Hh act fwd                   | caagctgatgagcccaaataggcaaacgcgctcaaacacaacaaagcctggtaattgttat | Insertion of HHR ribozyme                                                                                            |
| Hh act rev                   | gatgtaccgtggaatccagagccgctcttggttgttggagctgggaatacag          |                                                                                                                      |
| Hh inact fwd                 | gacgcgctcaaacacaacaa                                          | Inactivation of HHR ribozyme                                                                                         |
| Hh inact rev                 | tcgtcctatttggggactc                                           |                                                                                                                      |
| GuaB1HHR fwd                 | ttctaccgggacccgtaaatgtccgactaTGTacatccagctgatgagcccaaatagg    | Insertion of guanine xpt aptamer into HHR ribozyme with GuaB1HHR communication module                                |
| GuaB1HHR rev                 | cttggtgccatccacgggatataAGTAGgaatccagagccgctcttg               |                                                                                                                      |
| GuaB2HHR fwd                 | ttctaccgggacccgtaaatgtccgactaCGTacatccagctgatgagcccaaatagg    | Insertion of guanine xpt aptamer into HHR ribozyme with GuaB2HHR communication module                                |
| GuaB2HHR rev                 | cttggtgccatccacgggatataAGTAGgaatccagagccgctcttg               |                                                                                                                      |
| GuaB3HHR fwd                 | ttctaccgggacccgtaaatgtccgactaCTTaatccagctgatgagcccaaatagg     | Insertion of guanine xpt aptamer into HHR ribozyme with GuaB3HHR communication module                                |
| GuaB3HHR rev                 | cttggtgccatccacgggatataGATAGgaatccagagccgctcttg               |                                                                                                                      |
| GuaB4HHR fwd                 | ttctaccgggacccgtaaatgtccgactaAGTaatccagctgatgagcccaaatagg     | Insertion of guanine xpt aptamer into HHR ribozyme with GuaB4HHR communication module                                |
| GuaB4HHR rev                 | cttggtgccatccacgggatataACTAGgaatccagagccgctcttg               |                                                                                                                      |
| GuaB5HHR fwd                 | ttctaccgggacccgtaaatgtccgactaGTTaatccagctgatgagcccaaatagg     | Insertion of guanine xpt aptamer into HHR ribozyme with GuaB5HHR communication module                                |
| GuaB5HHR rev                 | cttggtgccatccacgggatataGCTAGgaatccagagccgctcttg               |                                                                                                                      |
| GuaB6HHR fwd                 | ttctaccgggacccgtaaatgtccgactaGGTaatccagctgatgagcccaaatagg     | Insertion of guanine xpt aptamer into HHR ribozyme with GuaB6HHR communication module                                |
| GuaB6HHR rev                 | cttggtgccatccacgggatataAGTGCgaatccagagccgctcttg               |                                                                                                                      |
| GuaB7HHR fwd                 | ttctaccgggacccgtaaatgtccgactaTGTaatccagctgatgagcccaaatagg     | Insertion of guanine xpt aptamer into HHR ribozyme with GuaB7HHR communication module                                |
| GuaB7HHR rev                 | cttggtgccatccacgggatataGTCgaatccagagccgctcttg                 |                                                                                                                      |
| Ampl fwd                     | agataaagcttggtaaccattgcaagcgtatt                              | Insertion of the constructs into CMV-eGFP pAAV expression plasmid backbone using HindIII and BglII restriction sites |
| Ampl rev                     | agataaagcttgaaggataacaatttaccaggc                             |                                                                                                                      |

### TetTwister Hit validation

| Name                   | Sequence                                                     | Comment                                                                                                                |
|------------------------|--------------------------------------------------------------|------------------------------------------------------------------------------------------------------------------------|
| Tw act fwd             | agatactcgaagcaacaactcctttaaagcggttacaag                      | Amplification of Twister ribozyme and insertion into psiCHECK-2 plasmid using XhoI and NotI restriction sites          |
| Tw act rev             | agatagcggccgctttcttttctcctttaaagcgtgatataag                  |                                                                                                                        |
| Tw inact fwd           | agatactcgaagcaacaactcctttaaagcgtgatacaag                     | Amplification of inactive Twister ribozyme and insertion into psiCHECK-2 plasmid using XhoI and NotI restriction sites |
| Tw inact rev           | agatagcggccgctttcttttctcctttaaagcgtgatataag                  |                                                                                                                        |
| T1 fwd                 | aggtcgaagagcctaaaacatacCGGttaatgcagctttaaaggagaaaaaagaaagc   | Insertion of tetraacycline aptamer into Twister ribozyme with T1 communication module                                  |
| T1 rev                 | aggtggtcgtattcttcaactctcCGTtaactctgacttttttgcgggcttg         |                                                                                                                        |
| T2 fwd                 | aggtcgaagagcctaaaacatacCGTtaactgcagctttaaaggagaaaaaagaaagc   | Insertion of tetraacycline aptamer into Twister ribozyme with T2 communication module                                  |
| T2 rev                 | aggtggtcgtattcttcaactctcCGTtaactctgacttttttgcgggcttg         |                                                                                                                        |
| T3 fwd                 | aggtcgaagagcctaaaacatacCGTtaactgcagctttaaaggagaaaaaagaaagc   | Insertion of tetraacycline aptamer into Twister ribozyme with T3 communication module                                  |
| T3 rev                 | aggtggtcgtattcttcaactctcCGGttaactctgacttttttgcgggcttg        |                                                                                                                        |
| T4 fwd                 | aggtcgaagagcctaaaacatacCTTtaactgcagctttaaaggagaaaaaagaaagc   | Insertion of tetraacycline aptamer into Twister ribozyme with T4 communication module                                  |
| T4 rev                 | aggtggtcgtattcttcaactctcCTTtaactctgacttttttgcgggcttg         |                                                                                                                        |
| T5 fwd                 | aggtcgaagagcctaaaacatacCGAGttaatgcagctttaaaggagaaaaaagaaagc  | Insertion of tetraacycline aptamer into Twister ribozyme with T5 communication module                                  |
| T5 rev                 | aggtggtcgtattcttcaactctcCGGttaactctgacttttttgcgggcttg        |                                                                                                                        |
| T6 fwd                 | aggtcgaagagcctaaaacatacCGGttaatgcagctttaaaggagaaaaaagaaagc   | Insertion of tetraacycline aptamer into Twister ribozyme with T6 communication module                                  |
| T6 rev                 | aggtggtcgtattcttcaactctcCGGttaactctgacttttttgcgggcttg        |                                                                                                                        |
| T7 fwd                 | aggtcgaagagcctaaaacatacCTGttaatgcagctttaaaggagaaaaaagaaagc   | Insertion of tetraacycline aptamer into Twister ribozyme with T7 communication module                                  |
| T7 rev                 | aggtggtcgtattcttcaactctcCTGttaactctgacttttttgcgggcttg        |                                                                                                                        |
| T8 fwd                 | aggtcgaagagcctaaaacatacCGTtaactgcagctttaaaggagaaaaaagaaagc   | Insertion of tetraacycline aptamer into Twister ribozyme with T8 communication module                                  |
| T8 rev                 | aggtggtcgtattcttcaactctcCGGttaactctgacttttttgcgggcttg        |                                                                                                                        |
| T9 fwd                 | aggtcgaagagcctaaaacatacCAGGttaatgcagctttaaaggagaaaaaagaaagc  | Insertion of tetraacycline aptamer into Twister ribozyme with T9 communication module                                  |
| T9 rev                 | aggtggtcgtattcttcaactctcCAGGttaactctgacttttttgcgggcttg       |                                                                                                                        |
| T10 fwd                | aggtcgaagagcctaaaacatacCGGttaatgcagctttaaaggagaaaaaagaaagc   | Insertion of tetraacycline aptamer into Twister ribozyme with T10 communication module                                 |
| T10 rev                | aggtggtcgtattcttcaactctcCGGttaactctgacttttttgcgggcttg        |                                                                                                                        |
| Neg. control #500 fwd  | aggtcgaagagcctaaaacatacCTGttaatgcagctttaaaggagaaaaaagaaagc   | Insertion of tetraacycline aptamer into Twister ribozyme with communication module of neg. control #500                |
| Neg. control #500 rev  | aggtggtcgtattcttcaactctcCTGttaactctgacttttttgcgggcttg        |                                                                                                                        |
| Neg. control #1000 fwd | aggtcgaagagcctaaaacatacAGCgttaactgcagctttaaaggagaaaaaagaaagc | Insertion of tetraacycline aptamer into Twister ribozyme with communication module of neg. control #1000               |
| Neg. control #1000 rev | aggtggtcgtattcttcaactctcAGCgttaactctgacttttttgcgggcttg       |                                                                                                                        |
| Neg. control #2000 fwd | aggtcgaagagcctaaaacatacCGTgtaactgcagctttaaaggagaaaaaagaaagc  | Insertion of tetraacycline aptamer into Twister ribozyme with communication module of neg. control #2000               |
| Neg. control #2000 rev | aggtggtcgtattcttcaactctcAGGttaactctgacttttttgcgggcttg        |                                                                                                                        |
| Neg. control #3000 fwd | aggtcgaagagcctaaaacatacCCGttaactgcagctttaaaggagaaaaaagaaagc  | Insertion of tetraacycline aptamer into Twister ribozyme with communication module of neg. control #3000               |
| Neg. control #3000 rev | aggtggtcgtattcttcaactctcAGGttaactctgacttttttgcgggcttg        |                                                                                                                        |

Tab. 4: Cloning primers used in this study.

## Supplementary Table 4 - continued

### Gua-U1 library and hit validation

| Name               | Sequence                                                              | Comment                                                                                                              |
|--------------------|-----------------------------------------------------------------------|----------------------------------------------------------------------------------------------------------------------|
| Gua-U1 library fwd | ttttacacgggaccgtaaatgtccgactaNNNaacttacctgcaaacacaaagcctgggaaattgttat | Insertion of guanine xpt aptamer onto U1 snRNP binding site with randomized communication module                     |
| Gua-U1 library rev | cttgctggccatccacgcgattataNNNaacttacctggtttgtttgtggactgggaatacag       |                                                                                                                      |
| U1 bs fwd          | caaacacacaaagcctgggaaattgttat                                         | Insertion of U1 snRNP binding site                                                                                   |
| U1 bs rev          | acttacctgtttgtttgtttgtggactgggaatacag                                 |                                                                                                                      |
| GuaU1B1 fwd        | ttttacacgggaccgtaaatgtccgactaGCGacttacctgcaaacacaaagcctgggaaattgttat  | Insertion of guanine xpt aptamer onto U1 snRNP binding site with GuaU1B1 communication module                        |
| GuaU1B1 rev        | cttgctggccatccacgcgattataGCCacttacctgtttgtttgtttggactgggaatacag       |                                                                                                                      |
| GuaU1B2 fwd        | ttttacacgggaccgtaaatgtccgactaGGCacttacctgcaaacacaaagcctgggaaattgttat  | Insertion of guanine xpt aptamer onto U1 snRNP binding site with GuaU1B2 communication module                        |
| GuaU1B2 rev        | cttgctggccatccacgcgattataGTCacttacctgtttgtttgtttggactgggaatacag       |                                                                                                                      |
| GuaU1B3 fwd        | ttttacacgggaccgtaaatgtccgactaAGCacttacctgcaaacacaaagcctgggaaattgttat  | Insertion of guanine xpt aptamer onto U1 snRNP binding site with GuaU1B3 communication module                        |
| GuaU1B3 rev        | cttgctggccatccacgcgattataAGCacttacctgtttgtttgtttggactgggaatacag       |                                                                                                                      |
| GuaU1B4 fwd        | ttttacacgggaccgtaaatgtccgactaAGGacttacctgcaaacacaaagcctgggaaattgttat  | Insertion of guanine xpt aptamer onto U1 snRNP binding site with GuaU1B4 communication module                        |
| GuaU1B4 rev        | cttgctggccatccacgcgattataAGGacttacctgtttgtttgtttggactgggaatacag       |                                                                                                                      |
| GuaU1B5 fwd        | ttttacacgggaccgtaaatgtccgactaAGTacttacctgcaaacacaaagcctgggaaattgttat  | Insertion of guanine xpt aptamer onto U1 snRNP binding site with GuaU1B5 communication module                        |
| GuaU1B5 rev        | cttgctggccatccacgcgattataAGTacttacctgtttgtttgtttggactgggaatacag       |                                                                                                                      |
| GuaU1B6 fwd        | ttttacacgggaccgtaaatgtccgactaTGCacttacctgcaaacacaaagcctgggaaattgttat  | Insertion of guanine xpt aptamer onto U1 snRNP binding site with GuaU1B6 communication module                        |
| GuaU1B6 rev        | cttgctggccatccacgcgattataTGCacttacctgtttgtttgtttggactgggaatacag       |                                                                                                                      |
| GuaU1B7 fwd        | ttttacacgggaccgtaaatgtccgactaAGCacttacctgcaaacacaaagcctgggaaattgttat  | Insertion of guanine xpt aptamer onto U1 snRNP binding site with GuaU1B7 communication module                        |
| GuaU1B7 rev        | cttgctggccatccacgcgattataAGCacttacctgtttgtttgtttggactgggaatacag       |                                                                                                                      |
| GuaU1B8 fwd        | ttttacacgggaccgtaaatgtccgactaACTacttacctgcaaacacaaagcctgggaaattgttat  | Insertion of guanine xpt aptamer onto U1 snRNP binding site with GuaU1B8 communication module                        |
| GuaU1B8 rev        | cttgctggccatccacgcgattataACTacttacctgtttgtttgtttggactgggaatacag       |                                                                                                                      |
| GuaU1B9 fwd        | ttttacacgggaccgtaaatgtccgactaATTacttacctgcaaacacaaagcctgggaaattgttat  | Insertion of guanine xpt aptamer onto U1 snRNP binding site with GuaU1B9 communication module                        |
| GuaU1B9 rev        | cttgctggccatccacgcgattataATTacttacctgtttgtttgtttggactgggaatacag       |                                                                                                                      |
| GuaU1B10 fwd       | ttttacacgggaccgtaaatgtccgactaTACacttacctgcaaacacaaagcctgggaaattgttat  | Insertion of guanine xpt aptamer onto U1 snRNP binding site with GuaU1B10 communication module                       |
| GuaU1B10 rev       | cttgctggccatccacgcgattataTACacttacctgtttgtttgtttggactgggaatacag       |                                                                                                                      |
| Ampl fwd           | agataaagcttggaccattgcagctatt                                          | Insertion of the constructs into CMV-eGFP pAAV expression plasmid backbone using HindIII and BglII restriction sites |
| Ampl rev           | agataaagcttgcggataacaatttcaccagcc                                     |                                                                                                                      |



### Supplementary Table 5

|                      |                                                     |
|----------------------|-----------------------------------------------------|
| TwisterTet_3N2N      | AGTAA([ACGT]{3})GAGAGG.{37}ACATAC([ACGT]{2})TTAAT   |
| TwisterTet_2N3N      | AGTAA([ACGT]{2})GAGAGG.{37}ACATAC([ACGT]{3})TTAAT   |
| TwisterTet_3N3N      | AGTAA([ACGT]{3})GAGAGG.{37}ACATAC([ACGT]{3})TTAAT   |
| TwisterTet_CG_3N2N   | AGTAAC([ACGT]{3})GAGAGG.{37}ACATAC([ACGT]{2})GTTAAT |
| TwisterTet_CG_2N3N   | AGTAAC([ACGT]{2})GAGAGG.{37}ACATAC([ACGT]{3})GTTAAT |
| TwisterTet_CG_3N3N   | AGTAAC([ACGT]{3})GAGAGG.{37}ACATAC([ACGT]{3})GTTAAT |
| TwisterTet_noCG_3N2N | AGTAA([ACGT]{3})AGAGG.{37}ACATA([ACGT]{2})TTAAT     |
| TwisterTet_noCG_2N3N | AGTAA([ACGT]{2})AGAGG.{37}ACATA([ACGT]{3})TTAAT     |
| TwisterTet_noCG_3N3N | AGTAA([ACGT]{3})AGAGG.{37}ACATA([ACGT]{3})TTAAT     |
| Spikein              | TTAGTAACAG                                          |

**Tab. 5: Regular expressions used in the variant extraction.**
